# Supplementary material for: Interactions between gut permeability and brain structure and function in health and irritable bowel syndrome
Source: PubMed Central journal article supplement — Neuroimage Clin. 2018 Nov 17;21:101602. doi: 10.1016/j.nicl.2018.11.012 (PMC6411611; doi:10.1016/j.nicl.2018.11.012), 2018-11-17
Supplement: mmc1.pdf [file mmc1.pdf]

## Supplemental Materials

**TITLE:** Interactions between gut permeability and brain structure and function in health and irritable bowel syndrome

**AUTHORS:** Suzanne T. Witt<sup>1\*</sup>, Olga Bednarska<sup>2,3‡</sup>, Åsa V. Keita<sup>2‡</sup>, Adriane Icenhour<sup>1,2</sup>, Michael P. Jones<sup>4</sup>, Sigrid Elsenbruch<sup>5</sup>, Johan D. Söderholm<sup>2</sup>, Maria Engström<sup>1,6</sup>, Emeran A. Mayer<sup>7</sup>, Susanna Walter<sup>1,2,3</sup>

**AFFILIATIONS:**

<sup>1</sup>Center for Medical Image Science and Visualization (CMIV), Linköping University, Linköping, Sweden

<sup>2</sup>Department of Clinical and Experimental Medicine, Linköping University, Linköping, Sweden

<sup>3</sup>Department of Gastroenterology, Linköping University Hospital, Linköping, Sweden

<sup>4</sup>Department of Psychology, Macquarie University, Ryde, New South Wales, Australia

<sup>5</sup>Institute of Medical Psychology & Behavioral Immunobiology, University Hospital Essen, University of Duisburg-Essen, Essen, Germany

<sup>6</sup>Department of Medical and Health Sciences (IMH), Linköping University, Linköping, Sweden

<sup>7</sup>Department of Medicine, UCLA, Los Angeles, CA, United States

<sup>‡</sup>Both authors contributed equally.

**\* CORRESPONDING AUTHOR:**

Suzanne T. Witt

BrainsCAN

Western Interdisciplinary Research Building, Room 3190

University of Western Ontario

London, ON N6A 3K7

CANADA

[switt4@uwo.ca](mailto:switt4@uwo.ca)

[stwittphd@gmail.com](mailto:stwittphd@gmail.com)

[+1 226 503 0725](tel:+12265030725)

## Supplemental Materials Contents

1. **Figure A.1. Group independent DMN component.** The one-sample t-test statistical map over all 47 subjects is thresholded at  $p < 0.05$ , Family Wise Error corrected for comparing across the whole brain. Color bar given in terms of t-statistic.
2. **Table A.1.** Peak stereotactic coordinates (MNI) for the whole-brain correlation analysis showing between-group associations for paracellular epithelial permeability of  $^{51}\text{Cr-EDTA}$  and DMN resting state functional connectivity.
3. **Table A.2.** Peak stereotactic coordinates (MNI) for the whole-brain correlation analysis showing associations between paracellular epithelial permeability of  $^{51}\text{Cr-EDTA}$  and DMN resting state functional connectivity in the healthy women.
4. **Table A.3.** Peak stereotactic coordinates (MNI) for the whole-brain correlation analysis showing associations between paracellular epithelial permeability of  $^{51}\text{Cr-EDTA}$  and DMN resting state functional connectivity in the IBS patients.
5. **Table A.4.** Peak stereotactic coordinates (MNI) for the whole-brain correlation analysis showing between-group associations for transcellular epithelial permeability of *Salmonella typhimurium* and DMN resting state functional connectivity.
6. **Table A.5.** Peak stereotactic coordinates (MNI) for the whole-brain correlation analysis showing associations between transcellular epithelial permeability of *Salmonella typhimurium* and DMN resting state functional connectivity in the healthy women.
7. **Table A.6.** Peak stereotactic coordinates (MNI) for the whole-brain correlation analysis showing associations between transcellular epithelial permeability of *Salmonella typhimurium* and DMN resting state functional connectivity in the IBS patients.
8. **Table A.7.** Peak stereotactic coordinates (MNI) for the whole-brain correlation analysis showing between-group associations between paracellular epithelial permeability of  $^{51}\text{Cr-EDTA}$  and whole-brain fractional anisotropy.
9. **Table A.8.** Peak stereotactic coordinates (MNI) for the whole-brain correlation analysis showing associations between paracellular epithelial permeability of  $^{51}\text{Cr-EDTA}$  and whole-brain fractional anisotropy in the healthy women.

10. **Table A.9.** Peak stereotactic coordinates (MNI) for the whole-brain correlation analysis showing associations between paracellular epithelial permeability of  $^{51}\text{Cr-EDTA}$  and whole-brain fractional anisotropy in the IBS patients.
11. **Table A.10.** Peak stereotactic coordinates (MNI) for the whole-brain correlation analysis showing between-group associations between transcellular epithelial permeability of *Salmonella typhimurium* and whole-brain fractional anisotropy.
12. **Table A.11.** Peak stereotactic coordinates (MNI) for the whole-brain correlation analysis showing associations between transcellular epithelial permeability of *Salmonella typhimurium* and whole-brain fractional anisotropy in the healthy women.
13. **Table A.12.** Peak stereotactic coordinates (MNI) for the whole-brain correlation analysis showing associations between transcellular epithelial permeability of *Salmonella typhimurium* and whole-brain fractional anisotropy in the IBS patients.

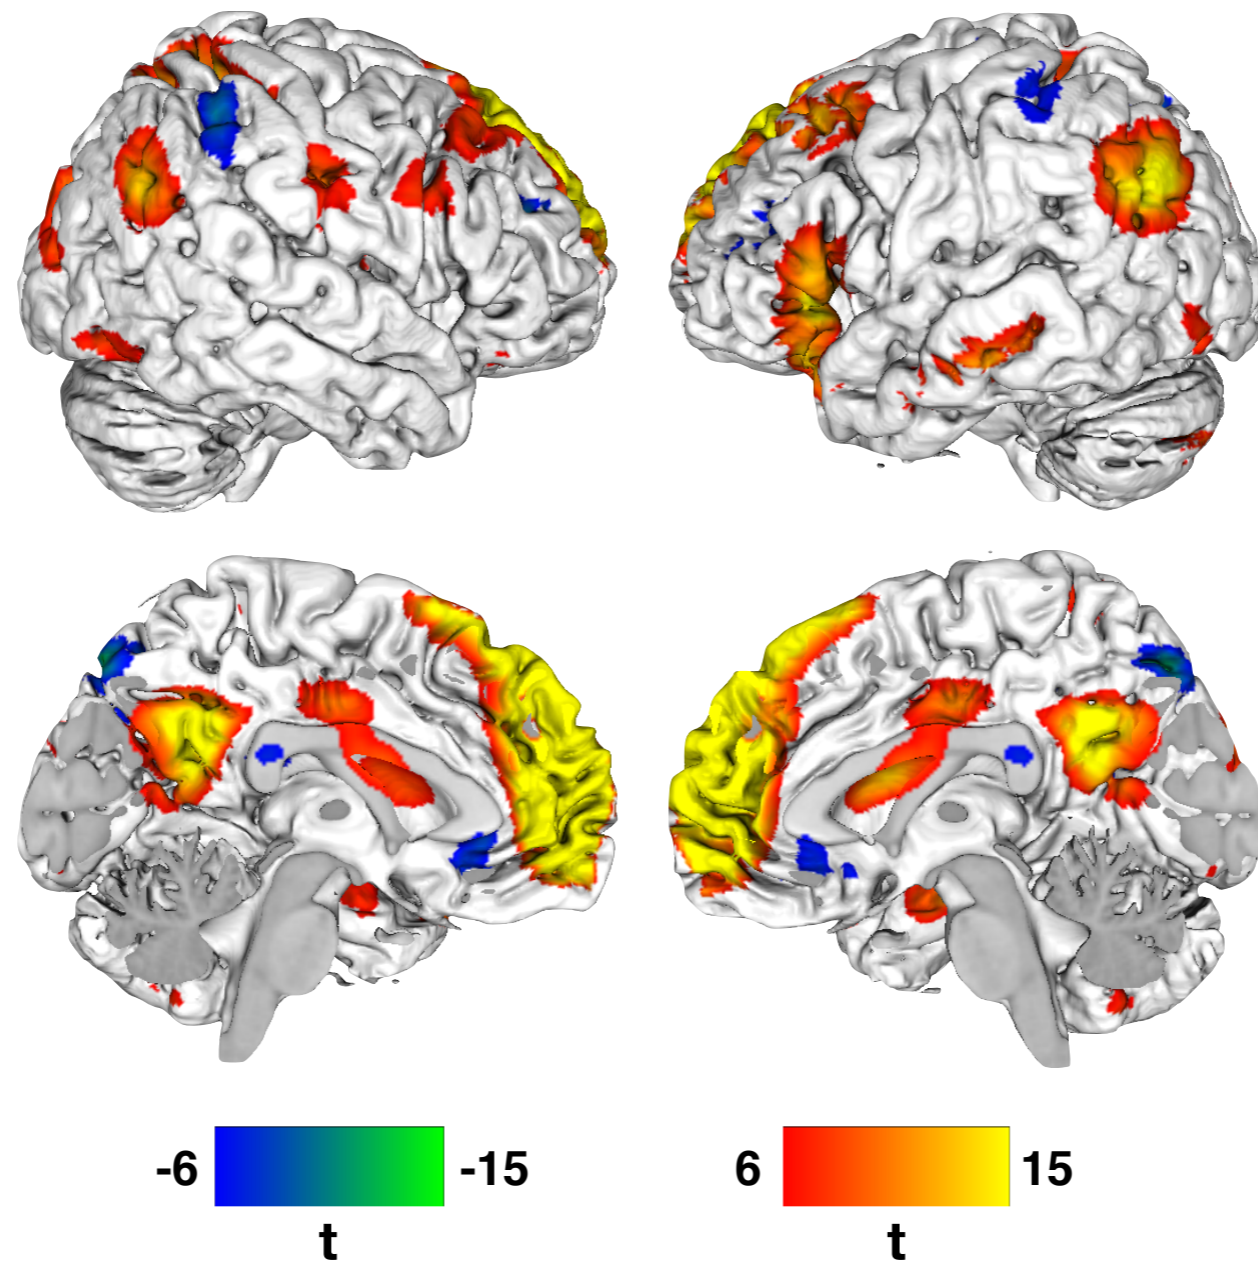

Figure A.1

**Table A.1.** Peak stereotactic coordinates (MNI) for the whole-brain correlation analysis showing between-group associations for paracellular epithelial permeability of <sup>51</sup>Cr-EDTA and DMN resting state functional connectivity.

| Region                                           | BA | X   | Y   | Z   | -log <sub>10</sub> (p) |
|--------------------------------------------------|----|-----|-----|-----|------------------------|
| <b>Positive Group Differences</b>                |    |     |     |     |                        |
| Frontal Cortex                                   |    |     |     |     |                        |
| Right Medial Frontal Gyrus                       |    | 10  | 56  | 4   | 3.7                    |
| Left Precentral/Postcentral gyrus                |    | -54 | -10 | 48  | 1.69                   |
| Right Superior Frontal Gyrus                     |    | 12  | 46  | 46  | 2.3                    |
| Left Middle Frontal Gyrus                        |    | -28 | 8   | 54  | 1.87                   |
| Left Middle Frontal Gyrus                        |    | -42 | 14  | 54  | 1.35                   |
| Left Inferior Frontal Gyrus/Middle Frontal Gyrus |    | -32 | 16  | 26  | 1.33                   |
| Left Superior Frontal Gyrus                      |    | -38 | 48  | 26  | 1.33                   |
| Right Precentral gyrus                           |    | 48  | -6  | 52  | 3.1                    |
| Left Middle Frontal Gyrus                        | 9  | -40 | 20  | 42  | 1.37                   |
| Cingulate Cortex                                 |    |     |     |     |                        |
| Parietal Cortex                                  |    |     |     |     |                        |
| Right Precuneus                                  |    | 10  | -60 | 22  | 1.55                   |
| Left Angular Gyrus                               |    | -46 | -74 | 34  | 1.73                   |
| Right Angular Gyrus/Supramarginal Gyrus          |    | 60  | -48 | 32  | 1.48                   |
| Left Inferior Parietal Lobe                      |    | -66 | -28 | 22  | 1.5                    |
| Right Precuneus                                  |    | 22  | -78 | 48  | 1.56                   |
| Right Postcentral Gyrus                          |    | 48  | -22 | 30  | 1.32                   |
| Right Postcentral Gyrus                          |    | 42  | -24 | 32  | 1.3                    |
| Right Paracentral Lobule                         |    | 10  | -32 | 62  | 1.94                   |
| Left Paracentral Lobule                          |    | -8  | -34 | 62  | 2.8                    |
| Temporal Lobe                                    |    |     |     |     |                        |
| Left Superior Temporal Gyrus                     |    | -48 | 18  | -24 | 1.46                   |
| Left Superior Temporal Gyrus                     |    | -68 | -28 | 4   | 1.39                   |

|                                                    |   |     |     |     |      |
|----------------------------------------------------|---|-----|-----|-----|------|
| Left Superior Temporal Gyrus                       |   | -64 | 0   | 8   | 1.42 |
| Left Middle Temporal Gyrus                         |   | -60 | 0   | -20 | 1.31 |
| Left Middle Temporal Gyrus                         |   | -60 | -38 | -8  | 1.53 |
| Subcortex                                          |   |     |     |     |      |
| Left Parahippocampus                               |   | -22 | 6   | -30 | 1.72 |
| Left Parahippocampus/Amygdala                      |   | -32 | -4  | -18 | 1.4  |
| Cerebellum                                         |   |     |     |     |      |
| Left Posterior Cerebellum (Crus I)                 |   | -46 | -50 | -38 | 1.67 |
| Posterior Cerebellum                               |   | 2   | -76 | -50 | 1.36 |
| Right Anterior Cerebellum (VI)                     |   | 38  | -44 | -34 | 3    |
| Brainstem                                          |   |     |     |     |      |
| Left Pons                                          |   | -18 | -30 | -36 | 1.38 |
| Periaqueductal Grey                                |   | 4   | -36 | -14 | 3.22 |
| Right Pons                                         |   | 16  | -24 | -38 | 1.92 |
| <b>Negative Group Differences</b>                  |   |     |     |     |      |
| Frontal Cortex                                     |   |     |     |     |      |
| Supplementary Motor Area                           | 6 | -2  | -10 | 54  | 3.4  |
| Left Inferior Frontal Gyrus/Orbital Frontal Cortex |   | -34 | 22  | -16 | 2.19 |
| Left Postcentral Gyrus                             |   | -54 | -18 | 28  | 1.78 |
| Right Postcentral Gyrus                            |   | 56  | -24 | 56  | 2.36 |
| Left Precentral Gyrus/Inferior Frontal Gyrus       |   | -56 | 6   | 16  | 1.46 |
| Right Inferior Frontal Gyrus                       |   | 40  | 30  | -22 | 1.48 |
| Left Postcentral Gyrus                             |   | -40 | -28 | 46  | 1.67 |
| Cingulate Cortex                                   |   |     |     |     |      |
| Parietal Cortex                                    |   |     |     |     |      |
| Left Precuneus                                     |   | -18 | -86 | 46  | 3.22 |
| Right Parietal Lobe                                |   | 28  | -48 | 22  | 3.7  |

|                                     |  |     |     |     |      |
|-------------------------------------|--|-----|-----|-----|------|
| Precuneus                           |  | -2  | -52 | 56  | 1.51 |
| Occipital Lobe                      |  |     |     |     |      |
| Right Middle Occipital Gyrus        |  | 54  | -72 | -6  | 2.19 |
| Right Middle Occipital Gyrus        |  | 32  | -82 | 24  | 1.58 |
| Lingual Gyrus                       |  | 6   | -44 | 0   | 1.33 |
| Lingual Gyrus                       |  | 6   | -58 | 0   | 1.77 |
| Temporal Lobe                       |  |     |     |     |      |
| Right Superior Temporal Lobe        |  | 56  | -20 | -2  | 2.17 |
| Left Middle Temporal Gyrus          |  | -58 | -16 | -22 | 1.73 |
| Right Middle Temporal Gyrus         |  | 40  | -88 | 2   | 1.33 |
| Right Inferior Temporal Gyrus       |  | 58  | -52 | -22 | 1.35 |
| Subcortex                           |  |     |     |     |      |
| Thalamus                            |  | 0   | -12 | 2   | 3.4  |
| Right Parahippocampus/Amygdala      |  | 14  | 0   | -18 | 3.7  |
| Right Parahippocampus               |  | 38  | -18 | -26 | 2.42 |
| Left Parahippocampus                |  | -38 | -24 | -20 | 1.96 |
| Parahippocampus                     |  | -6  | 4   | -20 | 1.37 |
| Left Caudate                        |  | -14 | -10 | 22  | 1.37 |
| Cerebellum                          |  |     |     |     |      |
| Left Anterior Cerebellum (VI)       |  | -28 | -50 | -30 | 1.69 |
| Right Anterior Cerebellum (V)       |  | 24  | -46 | -22 | 1.9  |
| Left Posterior Cerebellum (Crus II) |  | -26 | -76 | -40 | 1.51 |
| Right Posterior Cerebellum (Crus I) |  | 38  | -72 | -30 | 1.32 |
| Posterior Cerebellum (Crus II)      |  | 8   | -78 | -40 | 1.33 |
| Left Posterior Cerebellum (Crus I)  |  | -46 | -74 | -34 | 1.33 |
| Brainstem                           |  |     |     |     |      |
| Pons                                |  | -10 | -36 | -42 | 3.7  |
| Rostral Ventral Medulla             |  | -2  | -46 | -50 | 1.3  |

**Table A.2.** Peak stereotactic coordinates (MNI) for the whole-brain correlation analysis showing associations between paracellular epithelial permeability of <sup>51</sup>Cr-EDTA and DMN resting state functional connectivity in the healthy women.

| Region                                             | BA | X   | Y   | Z   | -log <sub>10</sub> (p) |
|----------------------------------------------------|----|-----|-----|-----|------------------------|
| <b>Postive Correlations</b>                        |    |     |     |     |                        |
| Frontal Cortex                                     |    |     |     |     |                        |
| Right Middle Frontal Gyrus                         |    | 32  | 44  | 24  | 3.22                   |
| Left Middle Frontal Gyrus/Supplementary Motor Area |    | -14 | -4  | 64  | 3.7                    |
| Right Precentral/Postcentral Gyrus                 |    | 38  | -26 | 70  | 2.55                   |
| Left Inferior Frontal Gyrus/Orbital Frontal Gyrus  |    | -40 | 30  | -12 | 2.8                    |
| Right Frontal Lobe                                 |    | 16  | 10  | -18 | 2.17                   |
| Left Insula                                        |    | -34 | -10 | 20  | 2.24                   |
| Right Inferior Frontal Gyrus                       |    | 32  | 22  | -24 | 1.84                   |
| Left Precentral/Inferior Frontal Gyrus             |    | -52 | -2  | 20  | 1.55                   |
| Right Inferior Frontal Gyrus                       |    | 34  | 12  | -16 | 2.02                   |
| Right Inferior Frontal Gyrus                       |    | 42  | 22  | -18 | 1.4                    |
| Right Inferior Frontal Gyrus/Orbital Frontal Gyrus |    | 34  | 24  | -12 | 1.39                   |
| Cingulate Cortex                                   |    |     |     |     |                        |
| Cingulate Gyrus                                    |    | 6   | -30 | 34  | 2.49                   |
| Left Cingulate Gyrus                               |    | -14 | -48 | 28  | 1.66                   |
| Parietal Cortex                                    |    |     |     |     |                        |
| Left Precuneus/Inferior Parietal Lobe              |    | -30 | -82 | 40  | 3.4                    |
| Right Angular Gyrus                                |    | 48  | -58 | 26  | 3                      |
| Left Precuneus                                     |    | -12 | -40 | 48  | 2.14                   |
| Right Parietal Lobe/Postcentral Gyrus              |    | 56  | -26 | 38  | 1.93                   |
| Left Postcentral Gyrus                             |    | -44 | -28 | 62  | 1.42                   |
| Occipital Lobe                                     |    |     |     |     |                        |
| Right Lingual Gyrus                                |    | 18  | -76 | -8  | 2.25                   |



|                                     |  |     |     |     |      |
|-------------------------------------|--|-----|-----|-----|------|
| Right Cuneus                        |  | 30  | -92 | 28  | 1.95 |
| Cuneus                              |  | 6   | -96 | 24  | 2.24 |
| Right Occipital Lobe                |  | 24  | -84 | 8   | 1.54 |
| Right Lingual Gyrus/Parahippocampus |  | 18  | -52 | 4   | 2.3  |
| Temporal Lobe                       |  |     |     |     |      |
| Right Middle Temporal Gyrus         |  | 52  | -60 | 0   | 3.7  |
| Right Superior Temporal Gyrus       |  | 56  | -28 | 6   | 2.12 |
| Left Middle Temporal Gyrus          |  | -58 | -10 | -4  | 1.7  |
| Subcortex                           |  |     |     |     |      |
| Right Thalamus                      |  | 8   | -12 | -2  | 3.7  |
| Right Parahippocampus               |  | 40  | -20 | -26 | 2.55 |
| Left Parahippocampus                |  | -34 | -16 | -32 | 1.74 |
| Left Parahippocampus                |  | -8  | 2   | -16 | 2.4  |
| Left Caudate                        |  | -12 | -10 | 18  | 1.49 |
| Left Thalamus                       |  | -18 | -28 | 6   | 1.5  |
| Cerebellum                          |  |     |     |     |      |
| Left Anterior Cerebellum (VI)       |  | -30 | -36 | -38 | 2.24 |
| Anterior Cerebellum (V)             |  | 0   | -58 | -4  | 1.76 |
| Right Anterior Cerebellum (VI)      |  | 22  | -52 | -20 | 1.48 |
| Brainstem                           |  |     |     |     |      |
| Pons                                |  | 0   | -16 | -28 | 2.47 |
| Rostral Ventral Medulla             |  | -10 | -26 | -30 | 2.08 |
| <b>Negative Correlations</b>        |  |     |     |     |      |
| Frontal Cortex                      |  |     |     |     |      |
| Left Inferior Frontal Gyrus/Insula  |  | -50 | 14  | 6   | 2.62 |
| Right Precentral Gyrus              |  | 42  | -10 | 46  | 2.01 |
| Right Precentral Gyrus              |  | 48  | 6   | 26  | 1.85 |
| Left Middle Frontal Gyrus           |  | -30 | 4   | 58  | 2.55 |

|                                            |  |     |     |     |      |
|--------------------------------------------|--|-----|-----|-----|------|
| Orbital Frontal Cortex                     |  | -6  | 22  | -12 | 1.97 |
| Left Frontal Pole                          |  | -40 | 48  | 6   | 1.74 |
| Left Precentral Gyrus                      |  | -58 | 2   | 38  | 2.05 |
| Superior Frontal Gyrus                     |  | 6   | 38  | 50  | 1.44 |
| Left Precentral Gyrus                      |  | -50 | -12 | 48  | 1.46 |
| Left Precentral Gyrus                      |  | -54 | -6  | 46  | 1.33 |
| Cingulate Cortex                           |  |     |     |     |      |
| Paracingulate/Cingulate Gyrus              |  | -6  | 46  | -6  | 2.7  |
| Right Paracingulate Gyrus                  |  | 12  | 54  | 6   | 3.22 |
| Left Cingulate Gyrus                       |  | -10 | 6   | 28  | 2.04 |
| Left Posterior Cingulate Gyrus             |  | -12 | -14 | 32  | 1.36 |
| Parietal Cortex                            |  |     |     |     |      |
| Left Superior Parietal Lobe                |  | -18 | -52 | 56  | 3.4  |
| Right Superior Parietal Lobe/Angular Gyrus |  | 46  | -46 | 58  | 2.7  |
| Left Precuneus/Occipital Cortex            |  | -18 | -68 | 36  | 3    |
| Left Parietal Lobe/Angular Gyrus           |  | -46 | -72 | 34  | 2.74 |
| Right Precuneus                            |  | 14  | -52 | 14  | 1.7  |
| Occipital Lobe                             |  |     |     |     |      |
| Left Middle Occipital Gyrus                |  | -28 | -70 | -2  | 3.4  |
| Right Fusiform Gyrus                       |  | 44  | -54 | -20 | 2.49 |
| Temporal Lobe                              |  |     |     |     |      |
| Right Middle Temporal Gyrus                |  | 54  | -32 | -12 | 2.8  |
| Left Middle Temporal Gyrus                 |  | -62 | -40 | -4  | 1.75 |
| Subcortex                                  |  |     |     |     |      |
| Right Thalamus                             |  | 8   | -12 | 14  | 1.8  |
| Left Parahippocampal Gyrus                 |  | -22 | 6   | -28 | 2.74 |
| Cerebellum                                 |  |     |     |     |      |

|                                     |  |     |     |     |      |
|-------------------------------------|--|-----|-----|-----|------|
| Right Anterior Cerebellum (VI)      |  | 12  | -66 | -16 | 1.91 |
| Left Posterior Cerebellum (VI)      |  | -36 | -60 | -24 | 1.66 |
| Right Posterior Cerebellum (Crus I) |  | 48  | -54 | -38 | 1.85 |
| Left Posterior Cerebellum (VI)      |  | -12 | -72 | -26 | 1.41 |
|                                     |  |     |     |     |      |
| Brainstem                           |  |     |     |     |      |
| Periaqueductal Grey                 |  | 2   | -38 | -14 | 3.7  |
| Right Pons                          |  | 16  | -32 | -36 | 2.44 |

**Table A.3.** Peak stereotactic coordinates (MNI) for the whole-brain correlation analysis showing associations between paracellular epithelial permeability of <sup>51</sup>Cr-EDTA and DMN resting state functional connectivity in the IBS patients.

| Region                                           | BA | X   | Y   | Z   | -log <sub>10</sub> (p) |
|--------------------------------------------------|----|-----|-----|-----|------------------------|
| <b>Positive Correlations</b>                     |    |     |     |     |                        |
| Frontal Cortex                                   |    |     |     |     |                        |
| Left Middle Frontal Gyrus/Orbital Frontal Cortex |    | -38 | 40  | -10 | 3.7                    |
| Right Superior Frontal Gyrus                     |    | 8   | 46  | 42  | 3.4                    |
| Right Medial Frontal Gyrus                       |    | 12  | 56  | 4   | 2.21                   |
| Left Inferior Frontal Gyrus                      |    | -42 | 46  | 10  | 2.04                   |
| Left Frontal Lobe                                |    | -16 | -28 | 46  | 1.75                   |
| Right Insula                                     |    | 48  | -12 | 4   | 1.72                   |
| Left Middle Frontal Gyrus                        |    | -28 | 12  | 52  | 1.55                   |
| Left Inferior Frontal Gyrus                      |    | -38 | 30  | -10 | 2.32                   |
| Left Insula                                      |    | -42 | 4   | 4   | 1.4                    |
| Right Precentral Gyrus                           |    | 62  | -4  | 36  | 1.46                   |
| Right Anterior Cingulate Cortex                  |    | 16  | 42  | 8   | 1.42                   |
| Right Medial Frontal Gyrus                       |    | 14  | 36  | 34  | 1.34                   |
| Cingulate Cortex                                 |    |     |     |     |                        |
| Posterior Cingulate Gyrus                        |    | 6   | -42 | 18  | 2.28                   |
| Parietal Cortex                                  |    |     |     |     |                        |
| Paracentral Lobule                               |    | -2  | -28 | 64  | 1.74                   |
| Left Precuneus/Parietal Lobe                     | 19 | -32 | -90 | 34  | 2.28                   |
| Right Superior Parietal Lobe                     |    | 36  | -56 | 56  | 1.4                    |
| Right Superior Parietal Lobe                     |    | 40  | -32 | 58  | 1.61                   |
| Right Paracentral Lobule                         |    | 18  | -34 | 66  | 1.59                   |
| Right Superior Parietal Lobe                     |    | 28  | -66 | 58  | 1.38                   |
| Left Precuneus/Parietal Lobe                     |    | -40 | -76 | 32  | 1.51                   |
| Right Superior Parietal Lobe                     |    | 46  | -46 | 62  | 1.41                   |

|                                                      |  |     |     |     |      |
|------------------------------------------------------|--|-----|-----|-----|------|
| Right Paracentral Lobule                             |  | 12  | -30 | 66  | 1.37 |
| Right Superior Parietal Lobe                         |  | 42  | -32 | 52  | 1.3  |
| Occipital Lobe                                       |  |     |     |     |      |
| Cuneus                                               |  | -6  | -92 | 6   | 2.01 |
| Right Fusiform Gyrus                                 |  | 46  | -66 | -20 | 2.3  |
| Right Calcarine/Posterior Cingulate                  |  | 8   | -60 | 14  | 1.81 |
| Left Cuneus                                          |  | -8  | -98 | -2  | 2.08 |
| Right Middle Occipital Gyrus                         |  | 50  | -70 | -14 | 1.42 |
| Temporal Lobe                                        |  |     |     |     |      |
| Right Superior Temporal Gyrus                        |  | 58  | 12  | -12 | 2.24 |
| Right Inferior Temporal Gyrus                        |  | 48  | -50 | -8  | 1.99 |
| Right Inferior Temporal Gyrus                        |  | 42  | -54 | -6  | 2.92 |
| Right Middle Temporal Gyrus                          |  | 34  | 4   | -36 | 1.66 |
| Right Middle Temporal Gyrus                          |  | 52  | -24 | -14 | 1.52 |
| Right Inferior Temporal Gyrus/Middle Occipital Gyrus |  | 44  | -62 | -6  | 1.31 |
| Right Superior Temporal Gyrus                        |  | 40  | 16  | -40 | 1.32 |
| Subcortex                                            |  |     |     |     |      |
| Right Putamen                                        |  | 32  | 8   | 8   | 2.12 |
| Left Parahippocampus                                 |  | -34 | -44 | -6  | 2.42 |
| Right Caudate                                        |  | 22  | 18  | 8   | 1.36 |
| Left Parahippocampus                                 |  | -22 | 4   | -30 | 1.3  |
| Cerebellum                                           |  |     |     |     |      |
| Right Posterior Cerebellum (IX)                      |  | 10  | -50 | -50 | 3.7  |
| Posterior Cerebellum (VI)                            |  | -6  | -74 | -12 | 1.76 |
| Right Anterior Cerebellum (Crus I)                   |  | 42  | -46 | -34 | 1.99 |
| Right Anterior Cerebellum (VI)                       |  | 16  | -68 | -14 | 1.68 |
| Right Posterior Cerebellum (V)                       |  | 8   | -56 | -22 | 1.4  |
| Left Anterior Cerebellum (IX)                        |  | -12 | -48 | -40 | 1.43 |

| Brainstem                         |    |     |     |     |      |
|-----------------------------------|----|-----|-----|-----|------|
|                                   |    |     |     |     |      |
| Negative Correlations             |    |     |     |     |      |
| Frontal Cortex                    |    |     |     |     |      |
| Right Supplementary Motor Area    |    | 8   | 0   | 52  | 1.97 |
| Right Middle Frontal Gyrus        |    | 32  | 46  | 28  | 2.92 |
| Left Insula/Putamen               |    | -24 | 6   | -6  | 2.1  |
| Superior Frontal Lobe             |    | -6  | 48  | 32  | 1.77 |
| Right Superior Frontal Gyrus      |    | 32  | 22  | 60  | 1.76 |
| Right Precentral Gyrus            |    | 28  | -20 | 76  | 2.42 |
| Left Inferior Frontal Gyrus       |    | -56 | 24  | -6  | 3.1  |
| Right Medial Frontal Gyrus        |    | 22  | 54  | 36  | 1.66 |
| Right Inferior Frontal Gyrus      |    | 26  | 26  | -10 | 1.63 |
| Right Inferior Frontal Gyrus      | 47 | 30  | 30  | -10 | 1.43 |
| Left Inferior Frontal Gyrus       | 47 | -30 | 26  | -20 | 1.32 |
| Left Middle Frontal Gyrus         |    | -24 | 28  | 36  | 1.34 |
|                                   |    |     |     |     |      |
| Cingulate Cortex                  |    |     |     |     |      |
|                                   |    |     |     |     |      |
| Parietal Cortex                   |    |     |     |     |      |
| Right Postcentral Gyrus           |    | 62  | -14 | 20  | 3    |
| Left Postcentral Gyrus            |    | -52 | -32 | 36  | 2.09 |
| Left Postcentral Gyrus            |    | -30 | -32 | 44  | 2.14 |
| Left Precuneus                    |    | -18 | -90 | 40  | 1.6  |
| Right Postcentral Gyrus           |    | 52  | -22 | 58  | 1.34 |
| Right Parietal Lobe/Angular Gyrus |    | 42  | -40 | 32  | 1.31 |
|                                   |    |     |     |     |      |
| Occipital Lobe                    |    |     |     |     |      |
| Right Lingual Gyrus               |    | 30  | -78 | -6  | 1.84 |
| Cuneus                            |    | -4  | -96 | 28  | 1.5  |
|                                   |    |     |     |     |      |
| Temporal Lobe                     |    |     |     |     |      |
| Left Superior Temporal Lobe       |    | -30 | -54 | 20  | 2.92 |

|                                |  |     |     |     |      |
|--------------------------------|--|-----|-----|-----|------|
| Left Middle Temporal Gyrus     |  | -62 | -10 | -18 | 2.03 |
| Subcortex                      |  |     |     |     |      |
| Right Parahippocampus/Amygdala |  | 16  | 2   | -28 | 3.7  |
| Right Thalamus                 |  | 8   | -4  | -2  | 1.59 |
| Right Caudate                  |  | 8   | 14  | 6   | 1.91 |
| Left Parahippocampus           |  | -10 | 0   | -18 | 1.47 |
| Left Thalamus                  |  | -12 | -20 | 0   | 1.34 |
| Left Parahippocampus           |  | -34 | -16 | -30 | 1.32 |
| Left Parahippocampus           |  | -34 | -20 | -30 | 1.34 |
| Right Parahippocampus          |  | 36  | -20 | -30 | 1.3  |
| Cerebellum                     |  |     |     |     |      |
| Left Anterior Cerebellum (VI)  |  | -30 | -52 | -32 | 3.7  |
| Left Anterior Cerebellum (V)   |  | -16 | -54 | -16 | 1.5  |
| Brainstem                      |  |     |     |     |      |
| Rostral Ventral Medulla        |  | 8   | -30 | -44 | 3.7  |

**Table A.4.** Peak stereotactic coordinates (MNI) for the whole-brain correlation analysis showing between-group associations for transcellular epithelial permeability of *Salmonella typhimurium* and DMN resting state functional connectivity.

| Region                                      | BA | X   | Y   | Z   | -log <sub>10</sub> (p) |
|---------------------------------------------|----|-----|-----|-----|------------------------|
| <b>Positive Group Differences</b>           |    |     |     |     |                        |
| Frontal Cortex                              |    |     |     |     |                        |
| Left Superior Frontal Gyrus                 |    | -22 | 60  | -2  | 2.62                   |
| Left Middle Frontal Gyrus                   |    | -44 | 26  | 26  | 1.87                   |
| Right Superior Frontal/Medial Frontal Gyrus |    | 14  | 38  | 40  | 1.85                   |
| Cingulate Cortex                            |    |     |     |     |                        |
| Right Cingulate Gyrus                       |    | 18  | -44 | 22  | 1.44                   |
| Parietal Cortex                             |    |     |     |     |                        |
| Left Parietal Lobe                          |    | -24 | -50 | 26  | 3.7                    |
| Left Precuneus                              |    | -12 | -46 | 56  | 1.65                   |
| Left Superior Parietal Lobe                 |    | -32 | -56 | 62  | 1.39                   |
| Right Paracentral Lobule                    |    | -8  | -28 | 76  | 1.39                   |
| Left Precuneus                              |    | -18 | -60 | 50  | 1.43                   |
| Precuneus/Postcentral                       |    | -4  | -58 | 70  | 1.32                   |
| Precuneus/Postcentral                       |    | -4  | -54 | 72  | 1.34                   |
| Occipital Lobe                              |    |     |     |     |                        |
| Right Occipital Lobe                        |    | 8   | -94 | 10  | 1.69                   |
| Calcarine                                   |    | 6   | -64 | 12  | 1.69                   |
| Left Cuneus                                 |    | -22 | -80 | 20  | 1.31                   |
| Temporal Lobe                               |    |     |     |     |                        |
| Right Middle Temporal Lobe                  |    | 58  | -52 | 10  | 2.44                   |
| Right Superior Temporal Gyrus               |    | 40  | 18  | -38 | 3.7                    |
| Left Superior Temporal Gyrus                |    | -60 | 8   | -10 | 1.8                    |
| Subcortex                                   |    |     |     |     |                        |



|                                                     |  |     |     |     |      |
|-----------------------------------------------------|--|-----|-----|-----|------|
|                                                     |  |     |     |     |      |
| <b>Cerebellum</b>                                   |  |     |     |     |      |
| Right Posterior Cerebellum (Crus II)                |  | 42  | -56 | -44 | 2.74 |
| Right Posterior Cerebellum                          |  | 34  | -82 | -24 | 1.63 |
| <b>Brainstem</b>                                    |  |     |     |     |      |
| Rostral Ventral Medulla                             |  | 0   | -40 | -50 | 2.04 |
| <b>Negative Group Differences</b>                   |  |     |     |     |      |
| <b>Frontal Cortex</b>                               |  |     |     |     |      |
| Right Inferior Frontal Gyrus/Orbital Frontal Gyrus  |  | 42  | 32  | 0   | 2.19 |
| Right Inferior Frontal Gyrus/Precentral Gyrus       |  | 56  | 10  | 14  | 1.81 |
| Superior Frontal Gyrus                              |  | -4  | 30  | 62  | 1.91 |
| Anterior Cingulate Cortex                           |  | -2  | 16  | 30  | 1.71 |
| Left Middle Frontal Gyrus                           |  | -30 | 38  | -18 | 2.03 |
| Middle Cingulate Gyrus/Supplementary Motor Area     |  | -4  | -8  | 52  | 1.42 |
| Left Superior Frontal Gyrus                         |  | -20 | 0   | 74  | 2.1  |
| Left Medial Frontal Gyrus/Anterior Cingulate Cortex |  | -8  | 44  | 14  | 1.59 |
| Left Inferior Frontal Gyrus/Orbital Frontal Gyrus   |  | -48 | 28  | -16 | 1.77 |
| Left Insula                                         |  | -38 | 2   | 18  | 1.39 |
| Left Middle/Superior Frontal Gyrus                  |  | -30 | 56  | 26  | 1.43 |
| Left Medial Frontal Gyrus                           |  | -14 | 64  | 22  | 1.4  |
| Right Middle Frontal Gyrus                          |  | 34  | 24  | 54  | 1.32 |
| Left Middle Frontal Gyrus                           |  | -30 | 28  | -6  | 1.33 |
| Right Precentral Gyrus                              |  | 14  | -28 | 68  | 1.32 |
| Left Inferior Frontal Gyrus                         |  | -48 | 20  | -4  | 1.3  |
| <b>Cingulate Cortex</b>                             |  |     |     |     |      |
| <b>Parietal Cortex</b>                              |  |     |     |     |      |
| Right Superior Parietal Lobe                        |  | 30  | -46 | 42  | 2.25 |
| Right Postcentral Gyrus                             |  | 68  | -10 | 14  | 1.61 |
| Left Postcentral Gyrus                              |  | -66 | -26 | 34  | 1.7  |

|                                                     |  |     |      |     |      |
|-----------------------------------------------------|--|-----|------|-----|------|
| Left Postcentral Gyrus                              |  | -50 | -12  | 24  | 1.63 |
| Left Postcentral Gyrus                              |  | -38 | -28  | 42  | 1.51 |
| Left Inferior Parietal Lobe                         |  | -36 | -42  | 48  | 1.69 |
| Occipital Lobe                                      |  |     |      |     |      |
| Lingual Gyrus/Cingulate Gyrus                       |  | 6   | -44  | 2   | 2.55 |
| Right Middle Occipital Gyrus                        |  | 52  | -70  | 2   | 3.1  |
| Right Lingual Gyrus/Cingulate Gyrus                 |  | 22  | -92  | 22  | 1.6  |
| Right Occipital Lobe/Lingual Gyrus                  |  | 24  | -70  | -14 | 1.49 |
| Right Occipital Lobe                                |  | 22  | -104 | -2  | 1.67 |
| Left Middle Occipital Gyrus                         |  | -46 | -88  | 4   | 1.39 |
| Temporal Lobe                                       |  |     |      |     |      |
| Left Middle Temporal Gyrus/Lateral Occipital Cortex |  | -42 | -66  | 8   | 2.8  |
| Left Inferior Temporal Lobe                         |  | -56 | -42  | -22 | 1.9  |
| Left Inferior Temporal Lobe                         |  | -34 | -4   | -40 | 2.09 |
| Right Middle Temporal Gyrus                         |  | 70  | -42  | -4  | 1.58 |
| Right Middle Temporal Gyrus                         |  | 68  | -18  | -18 | 1.63 |
| Right Superior Temporal Lobe                        |  | 70  | -26  | 4   | 1.42 |
| Right Middle Temporal Gyrus                         |  | 38  | -58  | 20  | 1.32 |
| Left Temporal Occipital Fusiform Cortex             |  | -40 | -62  | -18 | 1.32 |
| Left Middle Temporal Gyrus                          |  | -8  | -82  | -14 | 1.32 |
| Subcortex                                           |  |     |      |     |      |
| Right Parahippocampus/Hippocampus                   |  | 12  | -6   | -6  | 1.32 |
| Cerebellum                                          |  |     |      |     |      |
| Left Posterior Cerebellum (Crus I)                  |  | -30 | -72  | -28 | 1.54 |
| Right Posterior Cerebellum (Crus I)                 |  | 44  | -68  | -32 | 1.47 |
| Right Posterior Cerebellum (Crus II)                |  | 8   | -84  | -26 | 1.39 |
| Left Posterior Cerebellum (Crus II)                 |  | -36 | -82  | -40 | 1.35 |
| Brainstem                                           |  |     |      |     |      |

|                   |  |   |    |     |      |
|-------------------|--|---|----|-----|------|
| Pons/Hypothalamus |  | 2 | -4 | -22 | 1.46 |
|-------------------|--|---|----|-----|------|

**Table A.5.** Peak stereotactic coordinates (MNI) for the whole-brain correlation analysis showing associations between transcellular epithelial permeability of *Salmonella typhimurium* and DMN resting state functional connectivity in the healthy women.

| Region                                            | BA | X   | Y   | Z   | -log <sub>10</sub> (p) |
|---------------------------------------------------|----|-----|-----|-----|------------------------|
| <b>Positive Correlations</b>                      |    |     |     |     |                        |
| Frontal Cortex                                    |    |     |     |     |                        |
| Right Inferior Frontal Gyrus                      |    | 40  | 32  | 2   | 2.55                   |
| Right Inferior Frontal Gyrus                      |    | 60  | 16  | 6   | 2.25                   |
| Right Precentral/Postcentral Gyrus                |    | 62  | -6  | 14  | 3.4                    |
| Superior Frontal Gyrus                            |    | -4  | 24  | 60  | 3.1                    |
| Left Anterior Cingulate Cortex                    |    | -16 | 42  | 12  | 2.62                   |
| Left Insula                                       |    | -36 | -30 | 14  | 3.1                    |
| Left Superior Frontal Gyrus                       |    | -18 | -4  | 68  | 2.36                   |
| Left Middle Frontal Gyrus/Inferior Frontal Gyrus  |    | -30 | 38  | -18 | 1.93                   |
| Left Inferior Frontal Gyrus/Orbital Frontal Gyrus |    | -50 | 28  | -14 | 1.94                   |
| Cingulate Cortex                                  |    |     |     |     |                        |
| Cingulate Gyrus/Anterior Cingulate Cortex         |    | -6  | 14  | 24  | 3.4                    |
| Parietal Cortex                                   |    |     |     |     |                        |
| Right Superior Parietal Lobe                      |    | 56  | -40 | 32  | 2.92                   |
| Left Inferior Parietal Lobe                       |    | -36 | -36 | 48  | 3.4                    |
| Left Postcentral Gyrus                            |    | -50 | -12 | 22  | 2.24                   |
| Occipital Lobe                                    |    |     |     |     |                        |
| Left Lingual Gyrus                                |    | -16 | -70 | -12 | 2.3                    |
| Right Lingual Gyrus                               |    | 22  | -72 | -16 | 1.55                   |
| Temporal Lobe                                     |    |     |     |     |                        |
| Left Middle Temporal Gyrus                        |    | -28 | -64 | 2   | 3.7                    |
| Left Inferior Temporal Lobe                       |    | -48 | -54 | -20 | 3.1                    |
| Right Middle Temporal Gyrus                       | 37 | 54  | -68 | 2   | 3.7                    |

|                                           |  |     |     |     |      |
|-------------------------------------------|--|-----|-----|-----|------|
| Left Inferior Temporal Lobe               |  | -38 | 0   | -32 | 1.97 |
| Right Middle Temporal Gyrus/Angular Gyrus |  | 36  | -62 | 24  | 1.65 |
| Subcortex                                 |  |     |     |     |      |
| Right Parahippocampus                     |  | 20  | -28 | -20 | 3.7  |
| Cerebellum                                |  |     |     |     |      |
| Left Posterior Cerebellum (VI/Crus I)     |  | -32 | -68 | -24 | 1.6  |
| Left Posterior Cerebellum (Crus I)        |  | -22 | -80 | -26 | 1.55 |
| Brainstem                                 |  |     |     |     |      |
| Brainstem (PAG)                           |  | -4  | -10 | -14 | 2.12 |
| <b>Negative Correlations</b>              |  |     |     |     |      |
| Frontal Cortex                            |  |     |     |     |      |
| Left Superior Frontal Gyrus               |  | -24 | 58  | -2  | 3.7  |
| Left Superior Frontal Gyrus               |  | -16 | 38  | 32  | 3.4  |
| Right Medial Frontal Gyrus                |  | 14  | 38  | 38  | 3.7  |
| Cingulate Cortex                          |  |     |     |     |      |
| Posterior Cingulate                       |  | 6   | -62 | 8   | 3.7  |
| Right Cingulate Gyrus                     |  | 22  | -52 | 32  | 2.42 |
| Right Posterior Cingulate                 |  | 10  | -54 | 24  | 1.36 |
| Parietal Cortex                           |  |     |     |     |      |
| Left Parietal Lobe/Postcentral Gyrus      |  | -22 | -44 | 68  | 2.92 |
| Left Superior Parietal Lobe               |  | -32 | -54 | 58  | 1.7  |
| Occipital Lobe                            |  |     |     |     |      |
| Occipital Lobe                            |  | 4   | -86 | 12  | 3.1  |
| Left Middle Occipital Gyrus               |  | -30 | -90 | -18 | 2.55 |
| Left Occipital Lobe                       |  | -26 | -98 | 20  | 2.7  |
| Temporal Lobe                             |  |     |     |     |      |

|                                     |  |     |     |     |      |
|-------------------------------------|--|-----|-----|-----|------|
| Right Middle Temporal Gyrus         |  | 44  | -50 | 6   | 3.4  |
| Right Superior Temporal Gyrus       |  | 40  | 16  | -40 | 3.7  |
| Left Superior Temporal Gyrus        |  | -60 | 4   | 0   | 3.22 |
| Subcortex                           |  |     |     |     |      |
| Cerebellum                          |  |     |     |     |      |
| Left Anterior Cerebellum (VI)       |  | -20 | -58 | -28 | 3.7  |
| Right Posterior Cerebellum (VIIb)   |  | 34  | -54 | -46 | 3.7  |
| Left Posterior Cerebellum (Crus II) |  | -36 | -62 | -44 | 2.11 |
| Right Posterior Cerebellum (Crus I) |  | 32  | -82 | -26 | 3.1  |
| Brainstem                           |  |     |     |     |      |
| Rostral Ventral Medulla             |  | 0   | -42 | -50 | 3.4  |

**Table A.6.** Peak stereotactic coordinates (MNI) for the whole-brain correlation analysis showing associations between paracellular epithelial permeability of *Salmonella typhimurium* and DMN resting state functional connectivity in the IBS patients.

| Region                                              | BA | X   | Y   | Z   | -log <sub>10</sub> (p) |
|-----------------------------------------------------|----|-----|-----|-----|------------------------|
| <b>Positive Correlations</b>                        |    |     |     |     |                        |
| Frontal Cortex                                      |    |     |     |     |                        |
| Right Middle Frontal Gyrus                          |    | 38  | 10  | 40  | 3.1                    |
| Superior Medial Frontal Gyrus                       |    | -2  | 64  | 16  | 3                      |
| Right Medial Frontal Gyrus/Supplementary Motor Area |    | 12  | -8  | 56  | 1.79                   |
| Right Superior Frontal Gyrus                        |    | 16  | 38  | 44  | 1.53                   |
| Supplementary Motor Area                            |    | -4  | -10 | 58  | 1.49                   |
| Left Middle Frontal Gyrus                           |    | -18 | 42  | -14 | 1.42                   |
| Right Precentral Gyrus                              |    | 64  | -6  | 36  | 1.4                    |
| Right Inferior Frontal Gyrus                        |    | 40  | 30  | -4  | 1.39                   |
| Right Precentral Gyrus                              |    | 42  | -8  | 44  | 1.35                   |
| Cingulate Cortex                                    |    |     |     |     |                        |
| Cingulate Gyrus                                     |    | 6   | -20 | 30  | 1.84                   |
| Right Posterior Cingulate                           |    | 10  | -54 | 24  | 2.24                   |
| Cingulate Gyrus/Anterior Cingulate Cortex           |    | -6  | 14  | 32  | 1.49                   |
| Cingulate Gyrus                                     |    | -6  | -20 | 26  | 1.36                   |
| Parietal Cortex                                     |    |     |     |     |                        |
| Left Postcentral Gyrus                              |    | -56 | -24 | 36  | 1.6                    |
| Left Precuneus                                      |    | -16 | -62 | 48  | 1.91                   |
| Left Superior Parietal Lobe                         |    | -32 | -54 | 60  | 2.25                   |
| Left Precuneus                                      |    | -28 | -62 | 36  | 1.3                    |
| Occipital Lobe                                      |    |     |     |     |                        |
| Right Lingual Gyrus                                 |    | 8   | -64 | -2  | 2.74                   |
| Temporal Lobe                                       |    |     |     |     |                        |

|                                          |  |     |     |     |      |
|------------------------------------------|--|-----|-----|-----|------|
| Left Middle Temporal Gyrus               |  | -58 | -64 | -10 | 1.75 |
| Left Middle Temporal Gyrus               |  | -64 | -48 | 24  | 1.37 |
| Subcortex                                |  |     |     |     |      |
| Right Parahippocampus                    |  | 18  | -20 | -20 | 1.45 |
| Left Hippocampus                         |  | -38 | -20 | -18 | 1.54 |
| Cerebellum                               |  |     |     |     |      |
| Left Anterior Cerebellum (I-IV)          |  | -10 | -40 | -20 | 3.7  |
| Left Posterior Cerebellum (VIIIb)        |  | -22 | -44 | -50 | 2.49 |
| Left Posterior Cerebellum (Crus II)      |  | -34 | -58 | -42 | 1.97 |
| Right Posterior Cerebellum (VIIIa/VIIIb) |  | 24  | -48 | -48 | 1.35 |
| Right Posterior Cerebellum (Crus I)      |  | 32  | -82 | -26 | 1.33 |
| Brainstem                                |  |     |     |     |      |
| <b>Negative Correlations</b>             |  |     |     |     |      |
| Frontal Cortex                           |  |     |     |     |      |
| Left Insula                              |  | -30 | -14 | 16  | 2.55 |
| Right Inferior Frontal Gyrus             |  | 62  | 12  | 30  | 2.36 |
| Right Inferior Frontal Gyrus             |  | 58  | 10  | 20  | 1.73 |
| Medial Frontal Gyrus                     |  | 2   | 60  | 0   | 1.63 |
| Right Middle Frontal Gyrus               |  | 46  | 4   | 56  | 2.09 |
| Anterior Cingulate Cortex                |  | 0   | 16  | 20  | 1.5  |
| Left Precentral/Postcentral Gyrus        |  | -48 | -8  | 24  | 1.97 |
| Left Medial Frontal Gyrus                |  | -22 | 56  | 8   | 1.53 |
| Right Supplementary Motor Area           |  | 10  | 12  | 50  | 1.45 |
| Left Rolandic Operculum                  |  | -48 | -26 | 18  | 1.56 |
| Cingulate Cortex                         |  |     |     |     |      |
| Parietal Cortex                          |  |     |     |     |      |
| Right Inferior Parietal Lobe             |  | 52  | -36 | 42  | 2.85 |



|                                  |  |     |     |     |      |
|----------------------------------|--|-----|-----|-----|------|
| Right Precuneus                  |  | 14  | -42 | 4   | 2.32 |
| Left Inferior Parietal Lobe      |  | -50 | -44 | 30  | 1.9  |
| Left Postcentral Gyrus           |  | -38 | -24 | 40  | 1.45 |
| Right Postcentral Gyrus          |  | 64  | -14 | 18  | 1.36 |
| Occipital Lobe                   |  |     |     |     |      |
| Right Calcarine                  |  | 16  | -86 | 0   | 2.38 |
| Right Lingual Gyrus              |  | 28  | -58 | -4  | 1.87 |
| Temporal Lobe                    |  |     |     |     |      |
| Left Middle Temporal Gyrus       |  | -36 | -4  | -38 | 1.64 |
| Left Superior Temporal Gyrus     |  | -66 | -44 | 6   | 1.31 |
| Subcortex                        |  |     |     |     |      |
| Cerebellum                       |  |     |     |     |      |
| Right Anterior Cerebellum (I-IV) |  | 12  | -42 | -26 | 1.63 |
| Left Anterior Cerebellum (I-IV)  |  | -10 | -42 | -28 | 1.71 |
| Brainstem                        |  |     |     |     |      |
| Brainstem (PAG?)                 |  | -4  | -10 | -14 | 2.66 |

**Table A.7.** Peak stereotactic coordinates (MNI) for the whole-brain correlation analysis showing between-group associations between paracellular epithelial permeability of <sup>51</sup>Cr-EDTA and whole-brain fractional anisotropy.

| Tract                                                                                                  | X   | Y   | Z   | -log <sub>10</sub> (p) |
|--------------------------------------------------------------------------------------------------------|-----|-----|-----|------------------------|
| <b>Positive Group Differences</b>                                                                      |     |     |     |                        |
| Association Fibers                                                                                     |     |     |     |                        |
| Cingulum (cingulate gyrus) L                                                                           | -9  | 33  | 14  | 1.56                   |
|                                                                                                        | -7  | -10 | 35  | 1.35                   |
|                                                                                                        | -7  | 8   | 33  | 1.39                   |
|                                                                                                        | -11 | -35 | 37  | 1.32                   |
| Cingulum (cingulate gyrus) R                                                                           | 11  | 27  | 20  | 1.49                   |
|                                                                                                        | 11  | 29  | 18  | 1.6                    |
|                                                                                                        | 10  | 17  | 26  | 1.39                   |
|                                                                                                        | 9   | -34 | 33  | 1.52                   |
| Cingulum (hippocampus) L                                                                               | -22 | -21 | -23 | 3                      |
|                                                                                                        | -13 | -44 | 2   | 1.91                   |
| Cingulum (hippocampus) R                                                                               | 17  | -42 | 1   | 1.96                   |
|                                                                                                        | 26  | -20 | -26 | 1.82                   |
| Fornix (cres) / Stria terminalis (can not be resolved with current resolution) R                       | 32  | -13 | -12 | 1.5                    |
| Sagittal stratum (include inferior longitudinal fasciculus and inferior fronto-occipital fasciculus) L | -37 | -51 | -7  | 1.34                   |
| Sagittal stratum (include inferior longitudinal fasciculus and inferior fronto-occipital fasciculus) R | 39  | -18 | -9  | 1.33                   |
| Superior fronto-occipital fasciculus (could be a part of anterior internal capsule) L                  | -21 | 4   | 20  | 2.62                   |
|                                                                                                        | -21 | -3  | 22  | 1.37                   |
| Superior fronto-occipital fasciculus (could be a part of anterior internal capsule) R                  | 22  | 2   | 21  | 1.5                    |
|                                                                                                        | 22  | -1  | 22  | 1.34                   |
| Superior longitudinal fasciculus L                                                                     | -31 | -30 | 25  | 2.55                   |
|                                                                                                        | -50 | -15 | 30  | 2.1                    |
| Superior longitudinal fasciculus R                                                                     | 34  | -38 | 34  | 1.54                   |
|                                                                                                        | 38  | -38 | 27  | 1.32                   |
|                                                                                                        | 36  | -41 | 30  | 1.32                   |
|                                                                                                        | 40  | -45 | 6   | 2.4                    |

|                             |     |     |     |      |
|-----------------------------|-----|-----|-----|------|
| Uncinate fasciculus R       | 34  | 0   | -16 | 1.48 |
| Commissural Fibers          |     |     |     |      |
| Body of corpus callosum     | -10 | -23 | 27  | 2.42 |
|                             | 1   | -11 | 25  | 1.55 |
|                             | -6  | -1  | 26  | 1.39 |
|                             | 0   | 2   | 25  | 1.39 |
|                             | -5  | -3  | 26  | 1.36 |
|                             | 7   | 13  | 22  | 1.3  |
|                             | 1   | -20 | 24  | 1.37 |
| Corticospinal tract R       | 4   | -26 | -38 | 2.85 |
|                             | 7   | -23 | -25 | 1.84 |
| Genu of corpus callosum     | 10  | 22  | 18  | 1.71 |
|                             | 3   | 23  | 14  | 1.36 |
| Splenium of corpus callosum | 16  | -41 | 11  | 1.91 |
|                             | 27  | -54 | 13  | 1.92 |
|                             | -13 | -48 | 24  | 1.85 |
|                             | -12 | -50 | 17  | 1.56 |
|                             | 13  | -47 | 29  | 2.08 |
|                             | -14 | -41 | 20  | 1.37 |
|                             | -4  | -36 | 15  | 1.52 |
|                             | 25  | -50 | 18  | 1.35 |
|                             | -4  | -37 | 17  | 1.3  |
| Projection Fibers           |     |     |     |      |
| Anterior corona radiata L   | -24 | 20  | 8   | 2.52 |
|                             | -22 | 33  | 15  | 1.78 |
|                             | -20 | 37  | 4   | 1.82 |
|                             | -21 | 24  | -4  | 1.52 |
|                             | -23 | 37  | -4  | 1.33 |
|                             | -19 | 36  | 8   | 1.38 |
| Anterior corona radiata R   | 24  | 19  | 11  | 1.34 |
|                             | 22  | 23  | 26  | 2.3  |

|                                     |     |     |     |      |
|-------------------------------------|-----|-----|-----|------|
|                                     | 13  | 33  | -12 | 1.36 |
|                                     | 27  | 22  | 17  | 1.32 |
|                                     | 23  | 32  | 18  | 1.32 |
|                                     | 23  | 26  | 25  | 2.92 |
| Anterior limb of internal capsule L | -18 | 19  | -2  | 2.66 |
|                                     | 15  | 13  | -1  | 2.09 |
|                                     | 20  | 21  | 0   | 1.6  |
|                                     | 19  | 11  | 10  | 1.42 |
|                                     | 21  | 14  | 11  | 1.31 |
| Cerebral peduncle L                 | -8  | -31 | -7  | 2.49 |
|                                     | -7  | -19 | -18 | 1.93 |
|                                     | -18 | -16 | -8  | 1.42 |
|                                     | -5  | -13 | -14 | 1.31 |
| Cerebral peduncle R                 | 8   | -20 | -12 | 3.1  |
|                                     | 12  | -4  | -8  | 2.49 |
|                                     | 14  | -14 | -13 | 1.71 |
|                                     | 8   | -15 | -18 | 1.59 |
|                                     | 5   | -23 | -20 | 1.42 |
|                                     | 10  | -22 | -17 | 1.36 |
|                                     | 13  | -19 | -18 | 1.3  |
|                                     | 10  | -22 | -14 | 1.32 |
|                                     | 13  | -17 | -6  | 1.75 |
| External capsule R                  | 32  | -15 | -3  | 1.97 |
| Inferior cerebellar peduncle L      | -7  | -43 | -43 | 1.56 |
| Inferior cerebellar peduncle R      | 12  | -41 | -40 | 2.11 |
|                                     | 9   | -40 | -36 | 1.34 |
| Medial lemniscus R                  | 6   | -34 | -29 | 1.65 |
|                                     | 4   | -37 | -39 | 1.39 |
|                                     | 6   | -39 | -38 | 1.32 |
| Middle cerebellar peduncle          | 20  | -60 | -30 | 2.74 |
|                                     | -16 | -28 | -32 | 2.62 |
|                                     | -19 | -66 | -38 | 2.8  |
|                                     | 17  | -45 | -39 | 1.99 |

|                                                          |     |     |     |      |
|----------------------------------------------------------|-----|-----|-----|------|
|                                                          | -34 | -48 | -39 | 2.27 |
|                                                          | -11 | -40 | -39 | 1.74 |
|                                                          | 18  | -29 | -34 | 1.72 |
|                                                          | -23 | -55 | -40 | 1.98 |
|                                                          | 16  | -48 | -30 | 1.42 |
|                                                          | 20  | -51 | -39 | 1.73 |
|                                                          | -16 | -48 | -31 | 1.36 |
|                                                          | 30  | -54 | -42 | 1.57 |
|                                                          | -15 | -46 | -31 | 1.34 |
|                                                          | -10 | -33 | -35 | 1.61 |
|                                                          | 16  | -32 | -37 | 1.32 |
|                                                          | 11  | -35 | -41 | 1.44 |
| Pontine crossing tract (a part of MCP)                   | -2  | -27 | -23 | 1.58 |
| Posterior corona radiata L                               | -18 | -46 | 35  | 1.52 |
|                                                          | -21 | -35 | 33  | 1.6  |
|                                                          | -31 | -40 | 20  | 1.63 |
| Posterior corona radiata R                               | 20  | -31 | 36  | 1.86 |
|                                                          | 27  | -30 | 24  | 1.47 |
|                                                          | 27  | -30 | 20  | 1.32 |
| Posterior limb of internal capsule L                     | -21 | -12 | 7   | 1.49 |
|                                                          | -22 | -16 | 1   | 1.55 |
| Posterior limb of internal capsule R                     | 20  | -19 | -7  | 1.91 |
|                                                          | 19  | -11 | 2   | 1.37 |
|                                                          | 17  | -19 | -3  | 1.42 |
| Posterior thalamic radiation (include optic radiation) L | -37 | -42 | 6   | 1.32 |
| Posterior thalamic radiation (include optic radiation) R | 30  | -57 | 15  | 1.37 |
|                                                          | 40  | -50 | -1  | 1.67 |
|                                                          | 33  | -46 | 18  | 2.05 |
|                                                          | 31  | -67 | 8   | 1.32 |
| Retrolenticular part of internal capsule L               | -27 | -32 | 21  | 2.08 |
|                                                          | -34 | -31 | -2  | 3.7  |
|                                                          | -34 | -39 | 10  | 1.34 |
| Retrolenticular part of internal capsule R               | 28  | -27 | 2   | 1.4  |

|                                                          |     |     |     |      |
|----------------------------------------------------------|-----|-----|-----|------|
| Superior cerebellar peduncle R                           | 8   | -34 | -23 | 2.17 |
|                                                          | 6   | -36 | -18 | 2.44 |
| Superior corona radiata L                                | -20 | -8  | 38  | 1.36 |
|                                                          | -21 | 8   | 24  | 1.48 |
| Superior corona radiata R                                | 25  | 4   | 20  | 1.3  |
|                                                          |     |     |     |      |
| <b>Negative Group Differences</b>                        |     |     |     |      |
| Association Fibers                                       |     |     |     |      |
| Superior longitudinal fasciculus L                       | -43 | -52 | 5   | 1.64 |
|                                                          |     |     |     |      |
| Commissural Fibers                                       |     |     |     |      |
| Splenium of corpus callosum                              | 18  | -47 | 19  | 1.57 |
|                                                          | 19  | -45 | 22  | 1.4  |
|                                                          | 22  | -48 | 15  | 1.54 |
|                                                          | 9   | -40 | 20  | 1.87 |
|                                                          |     |     |     |      |
| Projection Fibers                                        |     |     |     |      |
| Anterior corona radiata L                                | -20 | 27  | 21  | 2.22 |
| Corticospinal tract R                                    | 7   | -31 | -41 | 1.37 |
| Pontine crossing tract (a part of MCP)                   | -2  | -30 | -34 | 1.41 |
| Posterior corona radiata L                               | -26 | -44 | 29  | 1.65 |
| Posterior thalamic radiation (include optic radiation) R | 33  | -49 | 13  | 1.69 |
|                                                          | 35  | -50 | 16  | 1.42 |
| Superior corona radiata R                                | 24  | -1  | 34  | 1.64 |
|                                                          | 24  | -17 | 36  | 1.31 |

**Table A.8.** Peak stereotactic coordinates (MNI) for the whole-brain correlation analysis showing associations between paracellular epithelial permeability of <sup>51</sup>Cr-EDTA and whole-brain fractional anisotropy in the healthy women.

| Tract                                                                                                  | X   | Y   | Z   | -log <sub>10</sub> (p) |
|--------------------------------------------------------------------------------------------------------|-----|-----|-----|------------------------|
| <b>Positive Correlations</b>                                                                           |     |     |     |                        |
| Association Fibers                                                                                     |     |     |     |                        |
| Fornix (column and body of fornix)                                                                     | -1  | -16 | 20  | 2.62                   |
| Fornix (cres) / Stria terminalis (can not be resolved with current resolution) L                       | -28 | -32 | 2   | 3.4                    |
| Fornix (cres) / Stria terminalis (can not be resolved with current resolution) R                       | 28  | -24 | -7  | 1.58                   |
| Sagittal stratum (include inferior longitudinal fasciculus and inferior fronto-occipital fasciculus) L | -41 | 6   | -26 | 3.7                    |
|                                                                                                        | -39 | -47 | -3  | 1.31                   |
| Sagittal stratum (include inferior longitudinal fasciculus and inferior fronto-occipital fasciculus) R | 41  | -28 | -15 | 3.22                   |
|                                                                                                        | 38  | -49 | -3  | 1.41                   |
| Superior fronto-occipital fasciculus (could be a part of anterior internal capsule) L                  | -21 | 2   | 21  | 3.1                    |
| Superior longitudinal fasciculus L                                                                     | -37 | -40 | 17  | 3.22                   |
|                                                                                                        | -34 | 2   | 28  | 2.52                   |
|                                                                                                        | -49 | -15 | 31  | 2.55                   |
|                                                                                                        | -43 | -8  | 25  | 1.4                    |
| Superior longitudinal fasciculus R                                                                     | 36  | 17  | 22  | 2.85                   |
|                                                                                                        | 38  | -43 | 26  | 3.7                    |
|                                                                                                        | 44  | -43 | 3   | 2.92                   |
|                                                                                                        | 36  | -44 | 30  | 1.58                   |
|                                                                                                        | 37  | -16 | 27  | 1.35                   |
|                                                                                                        | 34  | -38 | 34  | 1.38                   |
|                                                                                                        | 40  | -54 | 7   | 1.55                   |
|                                                                                                        | 44  | -50 | 1   | 1.87                   |
|                                                                                                        | 33  | -3  | 20  | 1.35                   |
|                                                                                                        | 41  | -52 | 5   | 1.34                   |
| Commissural Fibers                                                                                     |     |     |     |                        |
| Body of corpus callosum                                                                                | 0   | -30 | 22  | 2.85                   |
|                                                                                                        | -10 | -4  | 29  | 3                      |

|                                     |     |     |     |      |
|-------------------------------------|-----|-----|-----|------|
|                                     | 10  | 3   | 28  | 2.47 |
|                                     | 11  | -7  | 29  | 2.22 |
|                                     | -8  | 14  | 22  | 2.36 |
|                                     | -2  | 3   | 25  | 2.66 |
|                                     | -4  | -8  | 26  | 1.53 |
|                                     | 7   | -29 | 22  | 1.46 |
|                                     | -12 | 14  | 25  | 1.39 |
| Genu of corpus callosum             | 10  | 22  | 19  | 2.66 |
|                                     | -8  | 32  | 3   | 1.91 |
|                                     | 5   | 28  | 9   | 1.48 |
| Splenium of corpus callosum         | 13  | -27 | 28  | 3.4  |
|                                     | -20 | -44 | 33  | 3    |
|                                     | -22 | -52 | 13  | 2.18 |
|                                     | -17 | -35 | 29  | 1.57 |
|                                     |     |     |     |      |
| Projection Fibers                   |     |     |     |      |
| Anterior corona radiata L           | -15 | 20  | -13 | 3.1  |
|                                     | -23 | 28  | 2   | 2.62 |
|                                     | -25 | 29  | 11  | 1.75 |
|                                     | -24 | 21  | 6   | 1.75 |
|                                     | -21 | 33  | 16  | 2.59 |
|                                     | -24 | 33  | -2  | 1.99 |
|                                     | -22 | 31  | 18  | 1.79 |
|                                     | -23 | 37  | -4  | 1.67 |
| Anterior corona radiata R           | 27  | 26  | 15  | 2.62 |
| Anterior limb of internal capsule L | -14 | 12  | -1  | 1.94 |
| Cerebral peduncle R                 | 13  | -26 | -14 | 1.97 |
|                                     | 19  | -20 | -8  | 1.37 |
| Corticospinal tract L               | -9  | -19 | -21 | 2.59 |
|                                     | -11 | -25 | -27 | 1.42 |
| Corticospinal tract R               | 8   | -24 | -32 | 2.7  |
| External capsule L                  | -30 | -16 | 14  | 3.22 |
|                                     | -34 | 0   | 1   | 1.67 |



|                                                          |     |     |     |      |
|----------------------------------------------------------|-----|-----|-----|------|
|                                                          | -33 | -13 | 1   | 1.64 |
|                                                          | -34 | -3  | 1   | 1.49 |
| Inferior cerebellar peduncle R                           | 12  | -44 | -36 | 2.27 |
|                                                          | 13  | -42 | -39 | 1.68 |
| Middle cerebellar peduncle                               | 23  | -49 | -35 | 2.18 |
|                                                          | 21  | -62 | -33 | 3.22 |
|                                                          | -21 | -45 | -37 | 2.59 |
|                                                          | 22  | -56 | -32 | 2.55 |
|                                                          | -22 | -51 | -33 | 3    |
|                                                          | -17 | -53 | -30 | 1.85 |
|                                                          | -14 | -35 | -30 | 1.55 |
|                                                          | -16 | -28 | -32 | 1.63 |
|                                                          | -25 | -52 | -36 | 1.45 |
|                                                          | -25 | -44 | -38 | 2.38 |
|                                                          | 17  | -49 | -30 | 1.94 |
|                                                          | -19 | -53 | -30 | 1.48 |
|                                                          | -18 | -45 | -34 | 1.58 |
|                                                          | 11  | -27 | -38 | 2.09 |
| Posterior corona radiata L                               | -33 | -64 | 27  | 2.85 |
|                                                          | -27 | -33 | 22  | 3.7  |
| Posterior corona radiata R                               | 12  | -61 | 32  | 3.4  |
|                                                          | 19  | -34 | 36  | 3.7  |
| Posterior limb of internal capsule L                     | -21 | -12 | 7   | 1.67 |
| Posterior limb of internal capsule R                     | 23  | -20 | 3   | 1.62 |
|                                                          | 26  | -11 | 16  | 1.41 |
| Posterior thalamic radiation (include optic radiation) L | -35 | -59 | -2  | 2.32 |
|                                                          | -37 | -47 | 1   | 1.74 |
|                                                          | -31 | -67 | 0   | 1.43 |
|                                                          | -30 | -62 | 0   | 1.38 |
|                                                          | -36 | -54 | 1   | 1.32 |
|                                                          | -37 | -41 | 0   | 1.38 |
| Posterior thalamic radiation (include optic radiation) R | 34  | -60 | 2   | 3.1  |
|                                                          | 28  | -56 | 14  | 2.74 |

|                                                          |     |     |     |      |
|----------------------------------------------------------|-----|-----|-----|------|
|                                                          | 38  | -46 | 0   | 1.47 |
|                                                          | 35  | -56 | 13  | 2.34 |
|                                                          | 36  | -56 | 8   | 1.61 |
| Retrolemniscular part of internal capsule L              | -38 | -35 | 5   | 1.78 |
| Retrolemniscular part of internal capsule R              | 39  | -26 | -4  | 3.4  |
|                                                          | 39  | -31 | -2  | 2.85 |
| Superior cerebellar peduncle R                           | 6   | -36 | -18 | 3.4  |
| Superior corona radiata L                                | -28 | -9  | 18  | 1.48 |
| Superior corona radiata R                                | 30  | -3  | 19  | 2.21 |
|                                                          | 30  | -10 | 23  | 2.15 |
|                                                          | 27  | -6  | 19  | 1.43 |
|                                                          |     |     |     |      |
|                                                          |     |     |     |      |
| <b>Negative Correlations</b>                             |     |     |     |      |
| Association Fibers                                       |     |     |     |      |
| Superior longitudinal fasciculus L                       | -43 | -51 | 4   | 1.5  |
|                                                          |     |     |     |      |
| Projection Fibers                                        |     |     |     |      |
| Posterior thalamic radiation (include optic radiation) R | 33  | -50 | 13  | 1.97 |
| Superior corona radiata R                                | 25  | -1  | 34  | 1.85 |
|                                                          | 23  | -17 | 36  | 1.39 |

**Table A.9.** Peak stereotactic coordinates (MNI) for the whole-brain correlation analysis showing associations between paracellular epithelial permeability of <sup>51</sup>Cr-EDTA and whole-brain fractional anisotropy in the IBS patients.

| Tract                                                                                                  | X   | Y   | Z   | -log <sub>10</sub> (p) |
|--------------------------------------------------------------------------------------------------------|-----|-----|-----|------------------------|
| <b>Positive Correlations</b>                                                                           |     |     |     |                        |
| Association Fibers                                                                                     |     |     |     |                        |
| Superior longitudinal fasciculus L                                                                     | -42 | -52 | 3   | 2.55                   |
| Commissural Fibers                                                                                     |     |     |     |                        |
| Splenium of corpus callosum                                                                            | 14  | -37 | 24  | 1.34                   |
| Projection Fibers                                                                                      |     |     |     |                        |
| Middle cerebellar peduncle                                                                             | -23 | -44 | -37 | 1.44                   |
| Posterior thalamic radiation (include optic radiation) R                                               | 29  | -61 | 17  | 1.39                   |
| Posterior thalamic radiation (include optic radiation) R                                               | 33  | -50 | 13  | 1.38                   |
| <b>Negative Correlations</b>                                                                           |     |     |     |                        |
| Association Fibers                                                                                     |     |     |     |                        |
| Cingulum (hippocampus) L                                                                               | -26 | -24 | -23 | 2.85                   |
| Fornix (cres) / Stria terminalis (can not be resolved with current resolution) L                       | -31 | -29 | -2  | 1.73                   |
|                                                                                                        | -27 | -33 | -1  | 1.47                   |
|                                                                                                        | -19 | -35 | 7   | 1.8                    |
|                                                                                                        | -27 | -31 | 2   | 1.34                   |
| Sagittal stratum (include inferior longitudinal fasciculus and inferior fronto-occipital fasciculus) L | -34 | -43 | 3   | 2.52                   |
|                                                                                                        | -35 | -21 | -6  | 2.11                   |
| Sagittal stratum (include inferior longitudinal fasciculus and inferior fronto-occipital fasciculus) R | 44  | -9  | -18 | 2.85                   |
|                                                                                                        | 41  | -43 | -5  | 2.25                   |
| Superior fronto-occipital fasciculus (could be a part of anterior internal capsule) L                  | -21 | 4   | 20  | 1.89                   |
| Superior longitudinal fasciculus R                                                                     | 40  | -43 | 18  | 1.44                   |
|                                                                                                        | 32  | 0   | 19  | 1.48                   |
| Commissural Fibers                                                                                     |     |     |     |                        |

|                                     |     |     |     |      |
|-------------------------------------|-----|-----|-----|------|
| Body of corpus callosum             | 13  | -30 | 28  | 1.32 |
|                                     | 14  | -25 | 29  | 1.35 |
| Genu of corpus callosum             | 4   | 28  | 10  | 1.69 |
| Splenium of corpus callosum         | -15 | -36 | 27  | 1.91 |
|                                     | -20 | -46 | 26  | 2.06 |
|                                     | -15 | -51 | 25  | 3.7  |
|                                     |     |     |     |      |
| Projection Fibers                   |     |     |     |      |
| Anterior corona radiata L           | -25 | 18  | 6   | 3.4  |
|                                     | -15 | 21  | -13 | 2.92 |
|                                     | -24 | 31  | 4   | 1.3  |
| Anterior corona radiata R           | 23  | 19  | 9   | 2.59 |
| Anterior limb of internal capsule L | -15 | 13  | 0   | 3.7  |
| Anterior limb of internal capsule R | 13  | 11  | 1   | 1.31 |
|                                     | 20  | 19  | 0   | 1.4  |
| Cerebral peduncle R                 | 12  | -4  | -8  | 2.74 |
|                                     | 18  | -21 | -6  | 1.85 |
|                                     | 18  | -12 | -6  | 1.72 |
|                                     | 14  | -25 | -13 | 2.17 |
|                                     | 14  | -15 | -14 | 1.65 |
| Corticospinal tract L               | -10 | -25 | -25 | 1.73 |
| Corticospinal tract R               | 5   | -27 | -35 | 2.62 |
| External capsule L                  | -31 | -14 | 11  | 3.4  |
|                                     | -30 | -4  | 15  | 3.7  |
|                                     | -32 | -6  | 8   | 2.4  |
|                                     | -34 | -1  | 1   | 2.03 |
|                                     | -34 | -3  | 1   | 2.18 |
| External capsule R                  | 32  | -4  | 10  | 3.7  |
| Inferior cerebellar peduncle R      | 12  | -41 | -40 | 2.62 |
|                                     | 11  | -43 | -36 | 1.6  |
| Middle cerebellar peduncle          | -14 | -24 | -29 | 3    |
|                                     | -18 | -56 | -30 | 1.46 |
|                                     | -14 | -32 | -28 | 1.32 |

|                                                          |     |     |     |      |
|----------------------------------------------------------|-----|-----|-----|------|
|                                                          | 19  | -56 | -30 | 1.56 |
| Posterior corona radiata L                               | -27 | -33 | 21  | 1.92 |
| Posterior corona radiata R                               | 20  | -50 | 29  | 1.35 |
|                                                          | 23  | -41 | 37  | 1.4  |
| Posterior limb of internal capsule L                     | -27 | -26 | 18  | 1.65 |
|                                                          | -22 | -13 | 7   | 1.41 |
| Posterior limb of internal capsule R                     | 22  | -15 | 2   | 1.58 |
|                                                          | 28  | -18 | 18  | 1.34 |
|                                                          | 19  | -11 | 2   | 2.47 |
| Posterior thalamic radiation (include optic radiation) L | -30 | -69 | 2   | 1.63 |
|                                                          | -38 | -54 | 2   | 1.67 |
|                                                          | -34 | -59 | 11  | 1.39 |
|                                                          | -34 | -45 | 6   | 1.3  |
| Posterior thalamic radiation (include optic radiation) R | 33  | -66 | 0   | 2    |
|                                                          | 37  | -53 | -3  | 1.56 |
|                                                          | 34  | -59 | 5   | 1.79 |
|                                                          | 36  | -56 | 8   | 1.52 |
|                                                          | 36  | -62 | 1   | 1.33 |
|                                                          | 34  | -43 | 14  | 1.81 |
| Retrolenticular part of internal capsule L               | -30 | -29 | 9   | 1.96 |
|                                                          | -30 | -37 | 15  | 3.7  |
|                                                          | -29 | -34 | 14  | 2.4  |
| Retrolenticular part of internal capsule R               | 35  | -33 | 10  | 1.33 |
| Superior cerebellar peduncle R                           | 6   | -36 | -18 | 1.38 |
| Superior corona radiata L                                | -28 | -14 | 18  | 1.54 |
| Superior corona radiata R                                | 26  | -15 | 23  | 1.38 |
|                                                          | 25  | -10 | 22  | 1.37 |
|                                                          | 28  | -16 | 23  | 1.32 |
|                                                          | 30  | -13 | 24  | 1.34 |

**Table A.10.** Peak stereotactic coordinates (MNI) for the whole-brain correlation analysis showing between-group associations between transcellular epithelial permeability of *Salmonella typhimurium* and whole-brain fractional anisotropy.

| Tract                                                                                                  | X   | Y   | Z   | -log <sub>10</sub> (p) |
|--------------------------------------------------------------------------------------------------------|-----|-----|-----|------------------------|
| <b>Positive Group Differences</b>                                                                      |     |     |     |                        |
| Association Fibers                                                                                     |     |     |     |                        |
| Cingulum (cingulate gyrus) L                                                                           | -8  | 10  | 31  | 1.81                   |
| Cingulum (cingulate gyrus) R                                                                           | 8   | 3   | 35  | 1.49                   |
|                                                                                                        | 7   | 7   | 34  | 1.41                   |
|                                                                                                        | 11  | -21 | 35  | 2.08                   |
|                                                                                                        | 8   | -3  | 36  | 1.42                   |
| Fornix (column and body of fornix)                                                                     | 5   | -19 | 17  | 1.87                   |
|                                                                                                        | 2   | 0   | 6   | 1.74                   |
|                                                                                                        | 0   | 3   | 4   | 1.91                   |
|                                                                                                        | 0   | -3  | 12  | 1.31                   |
|                                                                                                        | 0   | 3   | 10  | 1.34                   |
| Fornix (cres) / Stria terminalis (can not be resolved with current resolution) L                       | -25 | -31 | 2   | 1.39                   |
| Sagittal stratum (include inferior longitudinal fasciculus and inferior fronto-occipital fasciculus) L | -43 | -27 | -10 | 1.33                   |
|                                                                                                        | -43 | -24 | -11 | 1.3                    |
|                                                                                                        | -44 | -25 | -14 | 1.31                   |
| Superior fronto-occipital fasciculus (could be a part of anterior internal capsule) R                  | 24  | 5   | 19  | 1.74                   |
| Superior longitudinal fasciculus L                                                                     | -35 | 6   | 23  | 2.13                   |
|                                                                                                        | -32 | -20 | 25  | 1.49                   |
|                                                                                                        | -37 | -36 | 29  | 1.38                   |
|                                                                                                        | -41 | -49 | 8   | 1.48                   |
| Superior longitudinal fasciculus R                                                                     | 43  | -50 | 2   | 1.94                   |
|                                                                                                        | 40  | -41 | 13  | 1.73                   |
|                                                                                                        | 41  | -43 | 17  | 1.35                   |
|                                                                                                        | 40  | -52 | 11  | 1.31                   |
|                                                                                                        | 39  | -41 | 25  | 1.3                    |
|                                                                                                        | 40  | -45 | 6   | 1.62                   |
|                                                                                                        | 34  | -40 | 27  | 1.77                   |

|                                     |     |     |     |      |
|-------------------------------------|-----|-----|-----|------|
|                                     | 36  | -33 | 27  | 1.44 |
|                                     |     |     |     |      |
| Commissural Fibers                  |     |     |     |      |
| Body of corpus callosum             | 11  | -9  | 29  | 1.73 |
|                                     | -8  | -20 | 26  | 1.55 |
|                                     | 7   | -21 | 26  | 1.55 |
|                                     | 11  | -21 | 28  | 1.46 |
|                                     | -3  | -18 | 25  | 1.39 |
|                                     | 14  | -6  | 38  | 1.43 |
|                                     | 12  | -4  | 35  | 1.77 |
| Genu of corpus callosum             | -6  | 23  | -4  | 1.53 |
|                                     | 8   | 25  | -5  | 1.35 |
| Splenium of corpus callosum         | -18 | -46 | 11  | 1.52 |
|                                     | -23 | -53 | 17  | 1.52 |
|                                     | -14 | -47 | 17  | 2.49 |
|                                     | -10 | -43 | 16  | 1.82 |
|                                     | -14 | -41 | 11  | 1.64 |
|                                     | 23  | -48 | 17  | 1.53 |
|                                     | 15  | -41 | 19  | 1.56 |
|                                     | 18  | -44 | 27  | 1.33 |
|                                     | 19  | -46 | 13  | 1.52 |
|                                     | 9   | -41 | 16  | 1.45 |
|                                     | 16  | -46 | 22  | 1.31 |
|                                     | -17 | -45 | 29  | 1.49 |
|                                     |     |     |     |      |
| Projection Fibers                   |     |     |     |      |
| Anterior corona radiata L           | -13 | 26  | -10 | 1.46 |
|                                     | -24 | 25  | 10  | 1.32 |
|                                     | -21 | 38  | -1  | 1.33 |
|                                     | -12 | 31  | -13 | 1.35 |
| Anterior corona radiata R           | 18  | 28  | 25  | 1.35 |
| Anterior limb of internal capsule L | -18 | 17  | 1   | 1.57 |
|                                     | -15 | 12  | 2   | 1.39 |

|                                     |     |     |     |      |
|-------------------------------------|-----|-----|-----|------|
| Anterior limb of internal capsule R | 22  | -1  | 14  | 1.42 |
| Cerebral peduncle L                 | -13 | -24 | -15 | 1.57 |
|                                     | -8  | -11 | -7  | 1.45 |
| Cerebral peduncle R                 | 8   | -22 | -29 | 3.7  |
| Corticospinal tract L               | -9  | -27 | -24 | 2.8  |
|                                     | -6  | -18 | -22 | 2.17 |
|                                     | -5  | -21 | -22 | 1.47 |
|                                     | -8  | -26 | -36 | 1.36 |
|                                     | -4  | -22 | -29 | 2.07 |
| Corticospinal tract R               | 5   | -22 | -29 | 1.9  |
| External capsule R                  | 29  | 14  | 4   | 1.37 |
| Inferior cerebellar peduncle L      | -9  | -43 | -40 | 2.34 |
|                                     | -4  | -44 | -54 | 2.47 |
|                                     | -11 | -45 | -30 | 1.46 |
|                                     | -9  | -42 | -36 | 1.75 |
| Inferior cerebellar peduncle R      | 4   | -45 | -55 | 2.7  |
|                                     | 13  | -43 | -39 | 1.37 |
|                                     | 12  | -45 | -34 | 1.37 |
| Medial lemniscus L                  | -4  | -37 | -37 | 1.57 |
|                                     | -5  | -37 | -32 | 1.47 |
| Medial lemniscus R                  | 4   | -38 | -37 | 1.87 |
| Middle cerebellar peduncle          | -15 | -28 | -32 | 2.74 |
|                                     | -15 | -64 | -32 | 2.12 |
|                                     | -3  | -17 | -29 | 1.85 |
|                                     | 9   | -17 | -27 | 1.96 |
|                                     | 26  | -46 | -38 | 2.22 |
|                                     | 17  | -49 | -40 | 1.72 |
|                                     | -18 | -46 | -40 | 1.56 |
|                                     | 22  | -55 | -40 | 2.32 |
|                                     | 31  | -51 | -38 | 1.61 |
|                                     | -16 | -40 | -32 | 1.47 |
|                                     | 26  | -59 | -36 | 1.43 |
|                                     | -12 | -29 | -27 | 1.62 |



|                                                          |     |     |     |      |
|----------------------------------------------------------|-----|-----|-----|------|
|                                                          | -26 | -55 | -38 | 1.42 |
|                                                          | 23  | -49 | -39 | 1.42 |
|                                                          | 10  | -31 | -41 | 1.86 |
|                                                          | 28  | -56 | -37 | 1.33 |
|                                                          | 19  | -45 | -39 | 1.33 |
|                                                          | -23 | -48 | -36 | 1.3  |
|                                                          | 15  | -25 | -34 | 1.42 |
|                                                          | 20  | -61 | -33 | 1.48 |
|                                                          | -12 | -22 | -33 | 1.55 |
|                                                          | -13 | -39 | -35 | 1.5  |
|                                                          | 23  | -37 | -28 | 1.56 |
|                                                          | -13 | -21 | -28 | 1.37 |
| Pontine crossing tract (a part of MCP)                   | -3  | -27 | -26 | 1.79 |
|                                                          | -4  | -31 | -31 | 1.46 |
|                                                          | -6  | -30 | -35 | 1.37 |
|                                                          | 4   | -28 | -26 | 1.54 |
| Posterior limb of internal capsule L                     | -13 | -5  | -2  | 2.52 |
|                                                          | -23 | -14 | 18  | 1.53 |
| Posterior limb of internal capsule R                     | 22  | -6  | 13  | 1.39 |
|                                                          | 21  | -3  | 11  | 1.32 |
| Posterior thalamic radiation (include optic radiation) L | -31 | -65 | 11  | 1.59 |
|                                                          | -32 | -41 | 7   | 1.81 |
| Posterior thalamic radiation (include optic radiation) R | 29  | -60 | 17  | 1.87 |
|                                                          | 37  | -45 | 2   | 1.56 |
|                                                          | 33  | -44 | 11  | 1.38 |
|                                                          | 40  | -41 | 2   | 1.48 |
| Retrolenticular part of internal capsule R               | 29  | -21 | -2  | 1.6  |
| Superior cerebellar peduncle L                           | -7  | -32 | -13 | 1.94 |
|                                                          | -5  | -36 | -19 | 2.7  |
|                                                          | -7  | -50 | -28 | 1.36 |
|                                                          | -8  | -52 | -30 | 1.35 |
|                                                          | -6  | -32 | -22 | 1.4  |
|                                                          | -6  | -45 | -26 | 1.51 |

|                                                                                                        |     |     |     |      |
|--------------------------------------------------------------------------------------------------------|-----|-----|-----|------|
|                                                                                                        | -7  | -35 | -24 | 1.34 |
|                                                                                                        | -6  | -41 | -23 | 1.37 |
|                                                                                                        | -5  | -39 | -22 | 1.38 |
| Superior cerebellar peduncle R                                                                         | 5   | -36 | -19 | 1.64 |
|                                                                                                        | 6   | -39 | -21 | 1.3  |
| Superior corona radiata R                                                                              | 19  | -4  | 40  | 1.38 |
|                                                                                                        | 21  | -1  | 26  | 1.41 |
|                                                                                                        | 22  | 9   | 34  | 2.66 |
|                                                                                                        | 21  | 4   | 39  | 1.63 |
|                                                                                                        | 22  | -1  | 38  | 1.43 |
|                                                                                                        |     |     |     |      |
|                                                                                                        |     |     |     |      |
| <b>Negative Group Differences</b>                                                                      |     |     |     |      |
| Association Fibers                                                                                     |     |     |     |      |
| Cingulum (cingulate gyrus) R                                                                           | 9   | 14  | 28  | 1.53 |
|                                                                                                        | 10  | 22  | 24  | 1.32 |
|                                                                                                        | 10  | 24  | 24  | 1.32 |
| Cingulum (hippocampus) L                                                                               | -27 | -38 | -9  | 1.87 |
| Cingulum (hippocampus) R                                                                               | 26  | -35 | -10 | 2.24 |
|                                                                                                        | 25  | -29 | -16 | 2.42 |
| Sagittal stratum (include inferior longitudinal fasciculus and inferior fronto-occipital fasciculus) R | 41  | -37 | -10 | 1.43 |
|                                                                                                        |     |     |     |      |
| Commissural Fibers                                                                                     |     |     |     |      |
| Splenium of corpus callosum                                                                            | 16  | -39 | 8   | 2.04 |
|                                                                                                        | -23 | -54 | 10  | 1.52 |
|                                                                                                        | -8  | -39 | 12  | 2.4  |
|                                                                                                        |     |     |     |      |
| Projection Fibers                                                                                      |     |     |     |      |
| Anterior corona radiata R                                                                              | 26  | 19  | 15  | 1.38 |
|                                                                                                        | 26  | 19  | 11  | 1.51 |
| Anterior limb of internal capsule R                                                                    | 23  | 16  | 12  | 1.74 |
| Cerebral peduncle L                                                                                    | -5  | -17 | -18 | 1.62 |
|                                                                                                        | -11 | -17 | -18 | 1.3  |

|                                                          |     |     |     |      |
|----------------------------------------------------------|-----|-----|-----|------|
| Cerebral peduncle R                                      | 10  | -10 | -13 | 1.59 |
| Corticospinal tract L                                    | -7  | -20 | -31 | 1.61 |
| Corticospinal tract R                                    | 4   | -27 | -38 | 1.3  |
| External capsule R                                       | 36  | -7  | -3  | 1.67 |
| Middle cerebellar peduncle                               | 29  | -56 | -41 | 1.72 |
|                                                          | 27  | -60 | -41 | 1.47 |
|                                                          | 12  | -39 | -34 | 1.37 |
|                                                          | 26  | -51 | -39 | 1.37 |
|                                                          | -9  | -32 | -42 | 1.41 |
|                                                          | 14  | -33 | -28 | 1.35 |
| Pontine crossing tract (a part of MCP)                   | 2   | -23 | -24 | 2.19 |
|                                                          | 1   | -21 | -26 | 1.33 |
| Posterior corona radiata L                               | -21 | -25 | 19  | 2.01 |
| Posterior thalamic radiation (include optic radiation) R | 36  | -55 | 6   | 1.55 |
| Retrolenticular part of internal capsule L               | -28 | -36 | 17  | 1.65 |
|                                                          | -30 | -38 | 14  | 1.55 |
|                                                          | -27 | -30 | 18  | 1.68 |
| Superior corona radiata L                                | -24 | -16 | 47  | 1.94 |
|                                                          | -27 | -20 | 21  | 2.18 |
| Superior corona radiata R                                | 26  | -23 | 21  | 1.59 |
|                                                          | 25  | -10 | 21  | 1.4  |

**Table A.11.** Peak stereotactic coordinates (MNI) for the whole-brain correlation analysis showing associations between transcellular epithelial permeability of *Salmonella typhimurium* and whole-brain fractional anisotropy in the healthy women.

| Tract                                                                                                  | X   | Y   | Z   | -log <sub>10</sub> (p) |
|--------------------------------------------------------------------------------------------------------|-----|-----|-----|------------------------|
| <b>Positive Correlations</b>                                                                           |     |     |     |                        |
| Association Fibers                                                                                     |     |     |     |                        |
| Sagittal stratum (include inferior longitudinal fasciculus and inferior fronto-occipital fasciculus) L | -44 | -32 | -11 | 1.54                   |
|                                                                                                        | -43 | -21 | -11 | 1.37                   |
| Superior fronto-occipital fasciculus (could be a part of anterior internal capsule) R                  | 22  | 3   | 20  | 1.31                   |
| Superior longitudinal fasciculus L                                                                     | -34 | 2   | 30  | 2.49                   |
|                                                                                                        | -37 | 5   | 22  | 1.39                   |
| Superior longitudinal fasciculus R                                                                     | 40  | -53 | 16  | 2.7                    |
|                                                                                                        | 42  | -42 | 10  | 2.8                    |
|                                                                                                        | 44  | -43 | 3   | 2.7                    |
|                                                                                                        | 40  | -6  | 28  | 1.6                    |
| Commissural Fibers                                                                                     |     |     |     |                        |
| Body of corpus callosum                                                                                | -10 | -5  | 29  | 3.22                   |
|                                                                                                        | -3  | 3   | 24  | 1.89                   |
|                                                                                                        | 11  | -7  | 29  | 2.25                   |
|                                                                                                        | 13  | -24 | 30  | 3                      |
|                                                                                                        | -8  | -20 | 26  | 2.3                    |
|                                                                                                        | -11 | -25 | 28  | 2.21                   |
|                                                                                                        | 8   | -10 | 27  | 1.74                   |
|                                                                                                        | -6  | -1  | 27  | 1.68                   |
|                                                                                                        | 6   | -21 | 25  | 1.82                   |
|                                                                                                        | -10 | -14 | 29  | 1.78                   |
|                                                                                                        | 10  | -22 | 27  | 2                      |
|                                                                                                        | -10 | -20 | 28  | 1.37                   |
| Splenium of corpus callosum                                                                            | 18  | -44 | 27  | 1.75                   |
|                                                                                                        | -18 | -47 | 18  | 1.69                   |
|                                                                                                        | -11 | -35 | 22  | 1.89                   |

|                                                          |     |     |     |      |
|----------------------------------------------------------|-----|-----|-----|------|
|                                                          | -17 | -49 | 18  | 1.48 |
|                                                          |     |     |     |      |
| <b>Projection Fibers</b>                                 |     |     |     |      |
| Anterior corona radiata L                                | -24 | 30  | 1   | 2.24 |
|                                                          | -24 | 26  | 10  | 1.47 |
|                                                          | -23 | 37  | -4  | 1.68 |
| Anterior corona radiata R                                | 27  | 16  | 28  | 1.37 |
| Cerebral peduncle L                                      | -6  | -12 | -12 | 1.99 |
|                                                          | -19 | -20 | -6  | 1.32 |
|                                                          | -18 | -21 | -8  | 1.39 |
| Cerebral peduncle R                                      | 11  | -16 | -18 | 1.64 |
| Corticospinal tract L                                    | -10 | -19 | -22 | 2.47 |
| Inferior cerebellar peduncle L                           | -9  | -43 | -39 | 2.21 |
|                                                          | -11 | -46 | -30 | 1.35 |
| Middle cerebellar peduncle                               | -23 | -45 | -36 | 2.12 |
|                                                          | -16 | -28 | -32 | 1.61 |
|                                                          | 19  | -36 | -36 | 1.36 |
| Posterior thalamic radiation (include optic radiation) R | 28  | -57 | 17  | 2.22 |
|                                                          | 35  | -57 | 11  | 1.67 |
| Superior cerebellar peduncle R                           | 5   | -32 | -17 | 1.32 |
| Superior corona radiata L                                | -28 | -17 | 21  | 1.81 |
|                                                          |     |     |     |      |
|                                                          |     |     |     |      |
| <b>Negative Correlations</b>                             |     |     |     |      |
| Association Fibers                                       |     |     |     |      |
| Cingulum (hippocampus) R                                 | 25  | -29 | -16 | 1.68 |
| Superior longitudinal fasciculus L                       | -42 | -51 | 7   | 1.46 |
|                                                          |     |     |     |      |
| Commissural Fibers                                       |     |     |     |      |
| Splenium of corpus callosum                              | -19 | -46 | 12  | 1.65 |
|                                                          | -14 | -46 | 16  | 1.38 |
|                                                          |     |     |     |      |
| Projection Fibers                                        |     |     |     |      |

|                                                          |     |     |     |      |
|----------------------------------------------------------|-----|-----|-----|------|
| Anterior limb of internal capsule R                      | 22  | -2  | 13  | 1.65 |
| Cerebral peduncle R                                      | 14  | -25 | -15 | 1.66 |
|                                                          | 7   | -17 | -21 | 1.57 |
|                                                          | 10  | -29 | -18 | 1.85 |
| Corticospinal tract L                                    | -6  | -27 | -30 | 1.75 |
| Corticospinal tract R                                    | 10  | -30 | -22 | 1.8  |
| External capsule L                                       | -27 | 14  | -9  | 1.3  |
| External capsule R                                       | 29  | 14  | 4   | 1.74 |
| Middle cerebellar peduncle                               | 12  | -19 | -26 | 1.81 |
|                                                          | 14  | -27 | -26 | 1.63 |
| Posterior limb of internal capsule L                     | -18 | -11 | -2  | 1.58 |
|                                                          | -19 | -10 | 2   | 1.4  |
|                                                          | -16 | -7  | 4   | 1.3  |
| Posterior limb of internal capsule R                     | 23  | -9  | 10  | 1.48 |
| Posterior thalamic radiation (include optic radiation) L | -31 | -69 | 7   | 2.28 |
| Superior cerebellar peduncle L                           | -3  | -26 | -17 | 2.55 |
|                                                          | -5  | -37 | -19 | 1.99 |
| Superior corona radiata R                                | 27  | 5   | 30  | 1.91 |

**Table A.12.** Peak stereotactic coordinates (MNI) for the whole-brain correlation analysis showing associations between transcellular epithelial permeability of *Salmonella typhimurium* and whole-brain fractional anisotropy in the IBS patients.

| Tract                                                    | X   | Y   | Z   | -log <sub>10</sub> (p) |
|----------------------------------------------------------|-----|-----|-----|------------------------|
| <b>Positive Correlations</b>                             |     |     |     |                        |
| Association Fibers                                       |     |     |     |                        |
| Superior longitudinal fasciculus L                       | -42 | -53 | 6   | 1.88                   |
| Commissural Fibers                                       |     |     |     |                        |
| Body of corpus callosum                                  | -14 | -17 | 32  | 2.1                    |
|                                                          | 4   | -16 | 25  | 1.38                   |
|                                                          | -9  | -19 | 28  | 1.32                   |
| Genu of corpus callosum                                  | -6  | 29  | 0   | 1.45                   |
| Splenium of corpus callosum                              | 23  | -48 | 17  | 1.39                   |
| Projection Fibers                                        |     |     |     |                        |
| Cerebral peduncle L                                      | -16 | -20 | -11 | 2.02                   |
| External capsule R                                       | 29  | 15  | -7  | 1.73                   |
| Inferior cerebellar peduncle R                           | 4   | -44 | -54 | 1.84                   |
| Middle cerebellar peduncle                               | -23 | -43 | -36 | 3.4                    |
|                                                          | 22  | -38 | -35 | 2.03                   |
|                                                          | -20 | -62 | -33 | 1.74                   |
|                                                          | 27  | -46 | -38 | 1.43                   |
|                                                          | -15 | -43 | -34 | 1.3                    |
|                                                          | 28  | -55 | -37 | 1.45                   |
| Posterior thalamic radiation (include optic radiation) L | -30 | -66 | 13  | 1.41                   |
| Posterior thalamic radiation (include optic radiation) R | 30  | -60 | 15  | 2.02                   |
| Superior cerebellar peduncle R                           | 5   | -32 | -18 | 1.52                   |
| <b>Negative Correlations</b>                             |     |     |     |                        |

| Association Fibers                                       |     |     |     |      |
|----------------------------------------------------------|-----|-----|-----|------|
| Cingulum (hippocampus) R                                 | 24  | -33 | -11 | 1.4  |
|                                                          | 22  | -28 | -16 | 1.91 |
| Projection Fibers                                        |     |     |     |      |
| Anterior corona radiata L                                | -24 | 26  | 10  | 1.4  |
| Anterior limb of internal capsule R                      | 23  | 20  | 9   | 2.8  |
| Cerebral peduncle L                                      | -12 | -17 | -15 | 2.22 |
|                                                          | -8  | -27 | -21 | 1.65 |
| Cerebral peduncle R                                      | 18  | -12 | -7  | 1.68 |
|                                                          | 5   | -26 | -33 | 1.84 |
| Middle cerebellar peduncle                               | 15  | -23 | -28 | 1.49 |
| Posterior limb of internal capsule R                     | 12  | -5  | -8  | 1.84 |
|                                                          | 19  | -11 | 2   | 1.67 |
|                                                          | 23  | -16 | 4   | 1.38 |
|                                                          | 22  | -18 | -1  | 1.35 |
|                                                          | 20  | -21 | -4  | 1.46 |
|                                                          | 16  | -6  | 1   | 1.34 |
| Posterior thalamic radiation (include optic radiation) R | 35  | -57 | 10  | 1.3  |
| Retrolenticular part of internal capsule L               | -28 | -36 | 17  | 2.05 |
